# Supplementary material
Source: publisher figshare collection journal article supplement (https://brill.figshare.com/ndownloader/files/36205167)
Supplement: Supplementary file 1 [file 36205167]

**Appendix B: Taxa-specific results**

For each taxon on the GTTN Tree Species Priority List 2019 (Cramm and Van Brusselen 2019) the following table indicates (i) whether an assignment test(s) was undertaken and for which method (G, genetic; D, DART TOFMS; S, stable isotopes, N:NIRS), (ii) the relevant study retrieved in the literature search, and (iii) if reference data exists with the potential for species identification in the reference database databases surveyed (e.g., presence of genetic markers in Genbank (presence of at least one of the nine barcoding markers: ITS, matK, psbA, rbcL, trnL, trnF, trnL-trnF, rpoB and rpoC1), DART TOFMS spectra in ForeST and/or anatomical descriptions in Commercial Timbers, InsideWood or Softwood ID) or NIRS literature.

| Region | Genus/Species name | Assignment test | ORIGIN ID literature search | | | | SPECIES ID reference database search | | | | | | | | | | | |
| --- | --- | --- | --- | --- | --- | --- | --- | --- | --- | --- | --- | --- | --- | --- | --- | --- | --- | --- |
|  |  |  | Genetics | DART TOFMS | Stable Isotopes | NIRS | DART TOFMS | NIRS | Wood Anatomy | Genetics | | | | | | | | |
|  |  |  |  |  |  |  |  |  |  | ITS | matK | psbA | rbcL | trnL | trnF | trnL-trnF | rpoB | rpoC1 |
| Central- and South-America | *Abies guatemalensis* | No - G | (Rasmussen *et al.* 2010) |  |  |  |  |  | Genus level | Yes | Yes |  | Yes |  | Yes | Yes |  |  |
| Asia, Pacific and Oceania | *Acacia catechu* |  |  |  |  |  |  |  | Genus level | Yes | Yes | Yes | Yes |  | Yes | Yes |  | Yes |
| Asia, Pacific and Oceania | *Acacia mangium* |  |  |  |  |  |  |  | Genus level | Yes | Yes | Yes | Yes |  | Yes | Yes |  |  |
| Europe | *Acer* spp*.* | No - G | (Kvesić *et al.* 2020; Rebrean *et al.* 2019) |  |  |  |  |  | Genus level | Yes | Yes | Yes | Yes | Yes | Yes | Yes | Yes | Yes |
| Africa | *Afzelia africana* | No - G | (Donkpegan *et al.* 2020) |  |  |  | Yes |  | Genus level | Yes | Yes | Yes | Yes | Yes | Yes | Yes |  |  |
| Africa | *Afzelia bipindensis* |  |  |  |  |  | Yes |  | Genus level | Yes | Yes | Yes | Yes | Yes |  |  |  |  |
| Asia, Pacific and Oceania | *Afzelia xylocarpa* |  |  |  |  |  | Yes |  | Genus level |  |  | Yes |  | Yes |  |  |  |  |
| Asia, Pacific and Oceania | *Agathis borneensis* |  |  |  |  |  |  |  | Genus level |  | Yes | Yes | Yes |  |  |  |  |  |
| Asia, Pacific and Oceania | *Agathis spp.* |  |  |  |  |  | Yes | (Ma *et al.* 2019) | Genus level | Yes | Yes | Yes | Yes |  | Yes | Yes | Yes | Yes |
| Central- and South-America | *Amburana acreana* |  |  |  |  |  |  |  | Genus level |  | Yes |  |  | Yes |  |  |  |  |
| Central- and South-America | *Amburana cearensis* |  |  |  |  |  |  |  | Genus level | Yes | Yes |  | Yes | Yes | Yes | Yes |  |  |
| Central- and South-America | *Aniba rosaeodora* |  |  |  |  |  |  |  | Genus level | Yes | Yes | Yes | Yes |  |  |  | Yes |  |
| Asia, Pacific and Oceania | *Anisoptera costata* | No - G | (Nguyen *et al.* 2021) |  |  |  |  |  | Genus level | Yes | Yes |  | Yes | Yes | Yes | Yes | Yes |  |
| Africa | *Antiaris toxicaria* |  |  |  |  |  |  |  | Genus level | Yes | Yes | Yes | Yes |  | Yes | Yes |  |  |
| Central- and South-America | *Apuleia leiocarpa* |  |  |  |  |  |  |  | Species level |  | Yes |  | Yes | Yes |  |  |  |  |
| Asia, Pacific and Oceania | *Aquilaria malaccensis* |  |  |  |  |  | Yes |  | Genus level | Yes | Yes | Yes | Yes | Yes | Yes | Yes | Yes | Yes |
| Asia, Pacific and Oceania | *Aquilaria spp.* | Yes - D  No - G | (Wang *et al.* 2020) | (Espinoza *et al.* 2014) |  |  | Yes |  | Genus level | Yes | Yes | Yes | Yes | Yes | Yes | Yes | Yes | Yes |
| Central- and South-America | *Araucaria angustifolia* |  | (de Sousa *et al.* 2020) |  |  |  | Yes |  | Genus level | Yes | Yes | Yes | Yes | Yes |  |  | Yes | Yes |
| Central- and South-America | *Aspidosperma macrocarpon* |  |  |  |  |  |  |  | Genus level |  |  |  |  |  |  |  |  |  |
| Central- and South-America | *Aspidosperma vargasii* |  |  |  |  |  |  |  | Genus level |  |  |  |  |  |  |  |  |  |
| Africa | *Aucoumea klaineana* |  |  |  |  |  | Yes |  | Species level |  |  |  | Yes |  | Yes | Yes |  |  |
| Central- and South-America | *Bagassa guianensis* |  |  |  |  |  |  |  | Species level | Yes | Yes | Yes | Yes | Yes | Yes | Yes |  | Yes |
| Africa | *Baillonella toxisperma* | No - G | (Ndiade-Bourobou *et al.* 2020) |  |  |  | Yes |  | Species level | Yes |  |  |  |  |  |  |  |  |
| Central- and South-America | *Bertholletia excelsa* |  |  |  |  |  |  |  | Species level | Yes |  | Yes | Yes | Yes | Yes | Yes |  |  |
| Asia, Pacific and Oceania, Europe, North America | *Betula spp.* | No - G | (de Dato *et al.* 2020) |  |  |  |  |  | Genus level | Yes | Yes | Yes | Yes | Yes | Yes | Yes | Yes | Yes |
| Central- and South-America | *Bowdichia nitida* |  |  |  |  |  |  |  | Genus level | Yes | Yes |  |  | Yes |  |  |  |  |
| Central- and South-America | *Brosimum utile* |  |  |  |  |  |  |  | Genus level |  |  | Yes | Yes | Yes |  |  |  |  |
| Central- and South-America | *Bulnesia sarmientoi* |  |  |  |  |  | Yes |  | Species level |  |  |  | Yes |  | Yes | Yes |  |  |
| Central- and South-America | *Caesalpinia echinata* | No - G | (Lira *et al.* 2003) |  |  |  | Yes |  | Species level | Yes | Yes |  |  | Yes | Yes | Yes |  |  |
| Central- and South-America | *Calophyllum brasiliense* |  |  |  |  |  |  |  | Genus level | Yes | Yes | Yes | Yes | Yes |  |  |  |  |
| Asia, Pacific and Oceania | *Calophyllum spp.* | No - G | (Lira *et al.* 2003) |  |  |  |  |  | Genus level | Yes | Yes |  | Yes | Yes | Yes | Yes |  |  |
| Central- and South-America | *Calycophyllum spruceanum* |  |  |  |  |  |  |  | Genus level | Yes | Yes | Yes | Yes |  | Yes | Yes |  |  |
| Asia, Pacific and Oceania | *Canarium spp.* |  |  |  |  |  |  |  | Genus level |  | Yes | Yes | Yes | Yes | Yes | Yes |  |  |
| Central- and South-America | *Capirona decorticans* |  |  |  |  |  |  |  | Species level | Yes | Yes | Yes | Yes | Yes |  |  |  |  |
| Central- and South-America | *Carapa guianensis* | No - G | (Dayanandan *et al.* 1999) |  |  |  | Yes | (Bergo *et al.* 2016; Braga *et al.* 2011; Brunner *et al.* 1996; Pastore *et al.* 2011; Soares *et al.* 2017) | Genus level |  |  |  |  |  |  |  |  |  |
| Central- and South-America | *Carapa surinamensis* |  |  |  |  |  |  |  | Genus level | Yes |  | Yes | Yes | Yes |  |  |  |  |
| Central- and South-America | *Cariniana spp.* |  |  |  |  |  |  |  | Genus level | Yes |  | Yes | Yes |  | Yes | Yes |  |  |
| Central- and South-America | *Caryocar costaricense* |  |  |  |  |  |  |  | Genus level |  |  |  |  |  |  |  |  |  |
| Europe | *Castanea sativa* | No - G | (Janfaza *et al.* 2017; Poljak *et al.* 2017) |  |  |  |  |  | Genus level | Yes | Yes | Yes | Yes | Yes | Yes | Yes | Yes | Yes |
| Central- and South-America | *Cedrela angustifolia* |  |  |  |  |  |  |  | Genus level | Yes |  | Yes |  |  | Yes | Yes | Yes | Yes |
| Central- and South-America | *Cedrela fissilis* | Yes - D  No - G | (Mangaravite *et al.* 2016; Paredes-Villanueva *et al.* 2020) | (Paredes-Villanueva *et al.* 2018) |  |  | Yes |  | Genus level | Yes | Yes | Yes | Yes | Yes | Yes | Yes | Yes | Yes |
| Central- and South-America | *Cedrela odorata* | Yes - G  Yes - D | (Paredes-Villanueva *et al.* 2019) | (Paredes-Villanueva *et al.* 2018) |  |  | Yes | (Bergo *et al.* 2016; Braga *et al.* 2011; Brunner *et al.* 1996; Pastore *et al.* 2011; Soares *et al.* 2017) | Genus level | Yes | Yes | Yes | Yes | Yes | Yes |  | Yes | Yes |
| Central- and South-America | *Cedrela spp.* | No - N |  |  |  | (Ramalho *et al.* 2018) |  |  | Genus level | Yes |  | Yes |  |  |  |  | Yes | Yes |
| Central- and South-America | *Cedrelinga catanaeformis/Cedrelinga cateniformis* |  |  |  |  |  |  |  | Species level | Yes | Yes |  | Yes | Yes | Yes | Yes |  |  |
| Africa, Central- and South-America | *Ceiba pentandra* | No - G | (Bocanegra-Gonzalez *et al.* 2018) |  |  |  |  |  | Genus level | Yes | Yes | Yes | Yes | Yes | Yes | Yes |  |  |
| Central- and South-America | *Ceiba samauma* |  |  |  |  |  |  |  | Genus level |  |  |  | Yes |  |  |  |  |  |
| Africa | *Celtis milbraedii* |  |  |  |  |  |  |  | Genus level |  |  |  |  |  |  |  |  |  |
| Africa | *Celtis zenkeri* |  |  |  |  |  |  |  | Genus level | Yes | Yes | Yes | Yes |  | Yes | Yes |  |  |
| Central- and South-America | *Chorisia integrifolia syn.: Ceiba integrifolia* |  |  |  |  |  |  |  | Genus level |  |  |  |  |  |  |  |  |  |
| Asia, Pacific and Oceania | *Chukrasia tabularis2 (previously Chukrana tabularis)* |  |  |  |  |  | Yes |  | Species level |  |  |  |  |  |  |  |  |  |
| Central- and South-America | *Copaifera spp.* | No - G | (Antiqueira *et al.* 2014) |  |  |  |  |  | Genus level | Yes | Yes |  | Yes | Yes | Yes | Yes |  |  |
| Central- and South-America | *Couratari guianensis* |  |  |  |  |  |  |  | Genus level | Yes | Yes | Yes | Yes |  | Yes | Yes |  |  |
| Central- and South-America | *Couratari spp.* |  |  |  |  |  |  |  | Genus level | Yes | Yes |  | Yes | Yes | Yes | Yes |  |  |
| Central- and South-America | *Cupressus montana syn.: Cupressus arizonica var. montana* |  |  |  |  |  |  |  | Genus level | Yes | Yes |  | Yes |  | Yes | Yes |  |  |
| Central- and South-America | *Cupressus spp.* | No - G | (Sekiewicz *et al.* 2020) |  |  |  |  |  | Genus level | Yes | Yes | Yes | Yes |  | Yes | Yes |  |  |
| Africa | *Cylicodiscus gabonensis* |  |  |  |  |  |  |  | Species level |  |  |  |  |  |  |  |  |  |
| Central- and South-America | *Dalbergia calycina* |  |  |  |  |  |  |  | Genus level |  |  |  |  |  |  |  |  |  |
| Asia, Pacific and Oceania | *Dalbergia cambodiana* |  |  |  |  |  |  |  | Genus level |  |  |  |  |  |  |  |  |  |
| Asia, Pacific and Oceania | *Dalbergia cochinchinensis* | No - G | (Hartvig *et al.* 2018; Hirata *et al.* 2021) |  |  |  | Yes |  | Genus level | Yes | Yes | Yes | Yes | Yes |  |  | Yes | Yes |
| Central- and South-America | *Dalbergia cubilquitzensis* |  |  |  |  |  | Yes |  | Genus level |  |  |  |  |  |  |  |  |  |
| Central- and South-America | *Dalbergia darienensis* |  |  |  |  |  |  |  | Genus level |  |  |  |  |  |  |  |  |  |
| Central- and South-America | *Dalbergia decipularis* |  |  |  |  |  |  |  | Species level | Yes | Yes |  |  | Yes |  |  |  |  |
| Central- and South-America | *Dalbergia glomerata* |  |  |  |  |  | Yes |  | Genus level |  |  |  |  |  |  |  |  |  |
| Central- and South-America | *Dalbergia granadillo* |  |  |  |  |  | Yes |  | Genus level |  |  |  |  |  |  |  |  |  |
| Asia, Pacific and Oceania | *Dalbergia latifolia* |  |  |  |  |  | Yes |  | Species level | Yes | Yes | Yes | Yes | Yes |  |  |  |  |
| Central- and South-America | *Dalbergia nigra* | No - G | (Resende *et al.* 2011; Silva Júnior *et al.* 2020) |  |  |  | Yes | (Snel *et al.* 2018) | Species level | Yes | Yes |  |  | Yes |  |  |  |  |
| Asia, Pacific and Oceania | *Dalbergia oliveri* | No - G | (Hartvig *et al.* 2018) |  |  |  | Yes |  | Genus level | Yes | Yes | Yes | Yes | Yes |  |  |  |  |
| Asia, Pacific and Oceania | *Dalbergia paniculata* |  |  |  |  |  |  |  | Genus level | Yes | Yes | Yes | Yes |  |  |  |  |  |
| Central- and South-America | *Dalbergia retusa* |  |  |  |  |  | Yes |  | Genus level | Yes | Yes | Yes | Yes | Yes |  |  |  |  |
| Asia, Pacific and Oceania | *Dalbergia sissoo* |  |  |  |  |  | Yes |  | Species level | Yes | Yes | Yes | Yes | Yes | Yes | Yes | Yes | Yes |
| Africa, Central- and South-America, Asia, Pacific and Oceania | *Dalbergia spp.* | No - G  Yes - D | (Andrianoelina *et al.* 2009; Hirata *et al.* 2021) | (McClure *et al.* 2015) |  |  | Yes | (Snel *et al.* 2018) | Genus level | Yes | Yes | Yes | Yes | Yes | Yes | Yes | Yes | Yes |
| Central- and South-America | *Dalbergia stevensonii* |  |  |  |  |  | Yes |  | Species level | Yes | Yes | Yes |  | Yes |  |  |  |  |
| Central- and South-America | *Dalbergia tucurensis* |  |  |  |  |  | Yes |  | Genus level | Yes | Yes | Yes |  | Yes |  |  |  |  |
| Central- and South-America | *Dicorynia guianensis* |  |  |  |  |  |  |  | Genus level |  | Yes | Yes | Yes | Yes |  |  | Yes | Yes |
| Central- and South-America | *Dinizia excelsa* |  |  |  |  |  |  |  | Species level | Yes | Yes |  |  | Yes | Yes | Yes |  |  |
| Asia, Pacific and Oceania | *Diospyros celebica* |  |  |  |  |  |  |  | Genus level |  | Yes |  | Yes |  | Yes | Yes |  |  |
| Asia, Pacific and Oceania | *Diospyros ebenum* |  |  |  |  |  | Yes |  | Genus level | Yes | Yes | Yes | Yes |  | Yes | Yes |  |  |
| Africa, Asia, Pacific and Oceania | *Diospyros spp.* |  |  |  |  |  | Yes |  | Genus level | Yes | Yes | Yes | Yes | Yes | Yes | Yes | Yes | Yes |
| Asia, Pacific and Oceania | *Dipterocarpus alatus* | No - G | (Dinh-Duy *et al.* 2019; Tam *et al.* 2014b) |  |  |  | Yes |  | Genus level |  | Yes |  | Yes | Yes | Yes | Yes |  |  |
| Asia, Pacific and Oceania | *Dipterocarpus costatus* | No - G | (Dinh-Duy *et al.* 2019; Tam *et al.* 2014a) |  |  |  |  |  | Genus level |  | Yes |  | Yes |  | Yes | Yes |  |  |
| Asia, Pacific and Oceania | *Dipterocarpus littoralis* |  |  |  |  |  |  |  | Genus level |  |  |  |  |  |  |  |  |  |
| Asia, Pacific and Oceania | *Dipterocarpus macrocarpus* |  |  |  |  |  | Yes |  | Genus level |  |  |  |  |  |  |  |  |  |
| Asia, Pacific and Oceania | *Dipterocarpus spp.* | No - G | (Nguyen *et al.* 2020) |  |  |  |  |  | Genus level | Yes | Yes | Yes | Yes | Yes | Yes | Yes | Yes |  |
| Asia, Pacific and Oceania | *Dipterocarpus tuberculatus* |  |  |  |  |  | Yes |  | Genus level |  | Yes |  | Yes |  | Yes | Yes |  |  |
| Central- and South-America | *Dipteryx alata* | No - G | (Honorio Coronado *et al.* 2020) |  |  |  |  |  | Genus level | Yes | Yes |  | Yes | Yes | Yes | Yes |  |  |
| Central- and South-America | *Dipteryx micrantha* | No - G | (Honorio Coronado *et al.* 2020) |  |  |  |  |  | Genus level | Yes | Yes | Yes |  | Yes |  |  |  |  |
| Central- and South-America | *Dipteryx odorata* | Yes - G | (Honorio Coronado *et al.* 2020) |  |  |  | Yes |  | Genus level | Yes | Yes | Yes | Yes | Yes | Yes | Yes |  |  |
| Central- and South-America | *Dipteryx panamensis* |  |  |  |  |  | Yes |  | Genus level | Yes |  |  |  | Yes |  |  |  |  |
| Central- and South-America | *Dipteryx spp.* | Yes - G | (Honorio Coronado *et al.* 2020) |  |  |  |  |  | Genus level | Yes | Yes | Yes | Yes | Yes | Yes | Yes |  |  |
| Asia, Pacific and Oceania | *Dryobalanops spp.* |  |  |  |  |  |  |  | Genus level | Yes | Yes |  | Yes | Yes | Yes | Yes | Yes |  |
| Asia, Pacific and Oceania | *Endospermum moluccanum* |  |  |  |  |  |  |  | Genus level | Yes | Yes |  | Yes | Yes | Yes | Yes |  |  |
| Africa | *Entandrophragma angolense* |  |  |  |  |  | Yes |  | Species level |  |  |  |  |  |  |  |  |  |
| Africa | *Entandrophragma candollei* |  |  |  |  |  | Yes |  | Species level |  | Yes |  | Yes |  |  |  |  |  |
| Africa | *Entandrophragma cylindricum* | Yes - G | (Degen *et al.* 2017; Jolivet and Degen 2012) |  |  |  | Yes |  | Species level | Yes |  |  |  |  |  |  |  |  |
| Africa | *Entandrophragma utile* |  |  |  |  |  | Yes |  | Species level | Yes | Yes |  | Yes |  |  |  |  |  |
| Central- and South-America | *Eperua falcata* |  |  |  |  |  |  |  | Genus level | Yes | Yes | Yes | Yes | Yes | Yes | Yes | Yes | Yes |
| Central- and South-America | *Eperua grandiflora* |  |  |  |  |  |  |  | Genus level | Yes | Yes | Yes | Yes | Yes | Yes | Yes | Yes | Yes |
| Africa | *Erythrophleum ivorense (Erythrophleum suaveolens)1* | Yes - G  Yes - S | (Duminil *et al.* 2010; Vlam *et al.* 2018) |  | (Vlam *et al.* 2018) |  | Yes |  | Genus level | Yes | Yes | Yes | Yes | Yes | Yes | Yes | Yes | Yes |
| Asia, Pacific and Oceania | *Eucalyptus globulus* | No - G | (Roman *et al.* 2020) |  |  |  |  |  | Genus level | Yes | Yes | Yes | Yes |  | Yes | Yes | Yes | Yes |
| Asia, Pacific and Oceania | *Eusideroxylon zwageri* |  |  |  |  |  |  | (Ma *et al.* 2019) | Genus level |  | Yes | Yes |  |  | Yes | Yes |  |  |
| North-America | *Fagus grandifolia* |  |  |  |  |  |  |  | Genus level | Yes | Yes | Yes | Yes |  | Yes | Yes |  | Yes |
| Europe, North-America | *Fagus spp.* |  |  |  |  |  |  | (Tsuchikawa *et al.* 2003) | Genus level | Yes | Yes | Yes | Yes | Yes | Yes | Yes |  |  |
| Europe | *Fagus sylvatica* | No - G | (Bijarpasi *et al.* 2020; Kembryte *et al.* 2021) |  |  |  |  | (Ma *et al.* 2019) | Genus level | Yes | Yes | Yes | Yes | Yes | Yes | Yes | Yes | Yes |
| Central- and South-America | *Ficus spp.* |  |  |  |  |  |  |  | Genus level | Yes | Yes | Yes | Yes | Yes | Yes | Yes |  | Yes |
| Central- and South-America | *Fitzroya cupressoides* |  |  |  |  |  | Yes |  | Species level | Yes | Yes | Yes | Yes | Yes | Yes |  |  |  |
| Asia, Pacific and Oceania | *Fraxinus mandshurica* | No - G | (Hu *et al.* 2010; Hu *et al.* 2008) |  |  |  | Yes | (Ma *et al.* 2019) | Genus level | Yes | Yes | Yes | Yes |  |  |  | Yes | Yes |
| Asia, Pacific and Oceania, Europe, North America | *Fraxinus spp.* |  | (Hebel *et al.* 2006; Heuertz *et al.* 2004; Peng-Li *et al.* 2019) |  |  |  |  |  | Genus level | Yes | Yes | Yes | Yes | Yes | Yes | Yes | Yes | Yes |
| Asia, Pacific and Oceania | *Gonystylus spp.* | Yes - G | (Diway *et al.* 2015; Fatma *et al.* 2011; Ng *et al.* 2016) |  |  |  |  |  | Genus level | Yes | Yes | Yes | Yes | Yes | Yes | Yes | Yes | Yes |
| Central- and South-America | *Goupia glabra* |  |  |  |  |  |  |  | Species level |  | Yes | Yes | Yes | Yes |  |  | Yes | Yes |
| Central- and South-America | *Guaiacum officinale* |  |  |  |  |  | Yes |  | Genus level | Yes | Yes | Yes | Yes |  | Yes | Yes |  |  |
| Central- and South-America | *Guaiacum sanctum* | No - G | (Oyama *et al.* 2016) |  |  |  | Yes |  | Genus level | Yes | Yes | Yes | Yes |  | Yes | Yes |  |  |
| Africa | *Guibourtia demeusei* |  |  |  |  |  | Yes |  | Genus level |  | Yes |  |  | Yes | Yes | Yes |  |  |
| Africa | *Guibourtia pellegriniana* |  |  |  |  |  | Yes |  | Genus level |  | Yes |  |  | Yes | Yes | Yes |  |  |
| Africa | *Guibourtia spp.* |  |  |  |  |  |  |  | Genus level | Yes | Yes | Yes | Yes | Yes | Yes | Yes |  |  |
| Africa | *Guibourtia tessmannii* |  |  |  |  |  | Yes |  | Genus level |  | Yes |  |  | Yes | Yes | Yes |  |  |
| Asia, Pacific and Oceania | *Gyrinops spp.* | No - G | (Tanaka and Ito 2020a; b) |  |  |  |  |  | Genus level | Yes | Yes | Yes | Yes | Yes | Yes | Yes | Yes | Yes |
| Central- and South-America | *Handroanthus albus2 (previously Tabebuia alba)* |  |  |  |  |  |  |  | Genus level |  | Yes |  | Yes |  |  |  |  |  |
| Central- and South-America | *Handroanthus heptaphyllus2 (previously Tabebuia heptaphylla)* |  |  |  |  |  |  |  | Genus level |  |  |  | Yes |  |  |  |  |  |
| Central- and South-America | *Handroanthus impetiginosum2 (previously Tabebuia impetiginosa)* |  |  |  |  |  |  |  | Genus level | Yes | Yes | Yes | Yes |  | Yes | Yes |  |  |
| Central- and South-America | *Handroanthus incanus2 (previously Tabebuia incana)* |  |  |  |  |  |  |  | Genus level |  |  |  |  |  |  |  |  |  |
| Central- and South-America | *Handroanthus ochracea2 (previously Tabebuia ochracea)* | No - G | (Moreira *et al.* 2009) |  |  |  |  |  | Genus level | Yes | Yes | Yes | Yes |  | Yes | Yes |  |  |
| Central- and South-America | *Handroanthus serratifolius2 (previously Tabebuia serratifolia)* |  |  |  |  |  | Yes |  | Genus level | Yes | Yes |  | Yes | Yes | Yes | Yes |  |  |
| Central- and South-America | *Handroanthus spp. = Tabebuia spp.* |  |  |  |  |  |  |  | Genus level | Yes | Yes | Yes | Yes | Yes | Yes | Yes |  |  |
| Asia, Pacific and Oceania | *Hopea odorata* |  |  |  |  |  |  |  | Genus level |  | Yes |  | Yes | Yes | Yes | Yes | Yes |  |
| Central- and South-America | *Hura crepitans* |  |  |  |  |  |  |  | Genus level | Yes | Yes | Yes | Yes |  | Yes | Yes |  |  |
| Central- and South-America | *Hymenaea courbaril* | Yes - G | (Chaves *et al.* 2018) |  |  |  |  | (Soares *et al.* 2017) | Genus level | Yes | Yes | Yes | Yes | Yes | Yes | Yes | Yes | Yes |
| Central- and South-America | *Hymenaea parviflora* |  |  |  |  |  |  |  | Genus level |  |  |  |  |  |  |  |  |  |
| Central- and South-America | *Hymenolobium elatum* |  |  |  |  |  |  |  | Genus level |  |  |  |  |  |  |  |  |  |
| Asia, Pacific and Oceania | *Intsia spp.* | Yes - G | (Lowe *et al.* 2010) |  |  |  |  |  | Genus level | Yes | Yes | Yes | Yes | Yes |  |  |  |  |
| Central- and South-America | *Jacaranda copaia* | No - G | (Scotti-Saintagne *et al.* 2013) |  |  |  |  | (Brunner *et al.* 1996) | Genus level |  | Yes | Yes | Yes | Yes | Yes | Yes |  |  |
| Central- and South-America | *Juglans boliviana* |  |  |  |  |  |  |  | Genus level | Yes | Yes |  |  |  |  |  |  |  |
| Central- and South-America | *Juglans olanchana* |  |  |  |  |  |  |  | Genus level | Yes | Yes | Yes | Yes |  | Yes |  |  |  |
| Africa | *Julbernardia pellegriniana, syn.: Paraberlinia bifoliolata2 (species and synonym swapped)* |  |  |  |  |  |  |  | Genus level | Yes | Yes |  |  | Yes | Yes | Yes |  |  |
| Africa | *Khaya anthotheca syn.: Khaya nyasica* |  |  |  |  |  | Yes |  | Genus level | Yes | Yes |  | Yes |  |  |  |  |  |
| Africa | *Khaya grandifoliola* |  |  |  |  |  |  |  | Genus level | Yes | Yes |  | Yes |  | Yes | Yes |  |  |
| Africa | *Khaya ivorensis* |  |  |  |  |  | Yes |  | Genus level | Yes | Yes | Yes | Yes | Yes | Yes | Yes |  |  |
| Africa | *Khaya madagascariensis* |  |  |  |  |  |  |  | Genus level |  |  |  |  |  |  |  |  |  |
| Africa | *Khaya senegalensis* | No - G | (Gaoue *et al.* 2014) |  |  |  |  |  | Genus level | Yes | Yes | Yes | Yes |  |  |  |  |  |
| Asia, Pacific and Oceania | *Koompassia excelsa* |  |  |  |  |  |  |  | Species level |  | Yes |  |  | Yes |  |  |  |  |
| Asia, Pacific and Oceania | *Lagerstroemia spp.* | No - G | (Jayakumar *et al.* 2014) |  |  |  |  |  | Genus level | Yes | Yes | Yes | Yes | Yes | Yes | Yes | Yes | Yes |
| Europe | *Larix decidua* | Yes - G | (Blanc-Jolivet *et al.* 2018) |  |  |  |  |  | Genus level | Yes | Yes | Yes | Yes | Yes | Yes | Yes | Yes | Yes |
| Asia, Pacific and Oceania | *Larix gmelinii* | No - G | (Oreshkova *et al.* 2013) |  |  |  |  |  | Genus level | Yes | Yes | Yes | Yes | Yes | Yes | Yes |  | Yes |
| Asia, Pacific and Oceania | *Larix kaempferi* |  |  |  |  |  |  |  | Genus level | Yes | Yes | Yes | Yes | Yes | Yes | Yes |  |  |
| Asia, Pacific and Oceania | *Larix olgensis* | No - G | (Polezhaeva *et al.* 2013) |  |  |  |  |  | Genus level | Yes | Yes | Yes | Yes |  | Yes | Yes |  |  |
| Asia, Pacific and Oceania | *Larix sibirica* | No - G | (Oreshkova *et al.* 2013; Vasilyeva *et al.* 2020a; Vasilyeva *et al.* 2020b) |  |  |  |  |  | Genus level | Yes |  | Yes | Yes |  | Yes | Yes |  |  |
| Africa | *Leplaea cedrata syn.: Guarea cedrata2 (species and synonym swapped)* |  |  |  |  |  |  |  | Genus level | Yes |  |  |  |  |  |  |  |  |
| Africa | *Leplaea thompsonii syn.: Guarea thompsonii2 (species and synonym swapped)* |  |  |  |  |  |  |  | Genus level | Yes | Yes | Yes | Yes |  |  |  |  |  |
| Africa | *Lophira alata* |  |  |  |  |  |  |  | Species level | Yes | Yes |  | Yes |  | Yes | Yes |  |  |
| Central- and South-America | *Machaerium scleroxylon* |  |  |  |  |  | Yes |  | Genus level | Yes | Yes |  | Yes | Yes |  |  |  |  |
| Central- and South-America | *Manilkara bidentata* |  |  |  |  |  |  | (Brunner *et al.* 1996) | Genus level | Yes | Yes | Yes | Yes | Yes |  |  |  |  |
| Central- and South-America | *Manilkara huberi* |  |  |  |  |  |  |  | Genus level | Yes | Yes | Yes | Yes | Yes |  |  | Yes | Yes |
| Central- and South-America | *Manilkara spp.* |  |  |  |  |  |  |  | Genus level | Yes | Yes | Yes | Yes |  |  |  |  |  |
| Africa | *Microberlinia bisulcata* |  |  |  |  |  | Yes |  | Genus level | Yes | Yes |  |  | Yes | Yes | Yes |  |  |
| Africa | *Microberlinia brazzavillensis* |  |  |  |  |  | Yes |  | Genus level | Yes | Yes |  |  | Yes | Yes | Yes |  |  |
| Central- and South-America | *Micropholis melinoniana* |  |  |  |  |  |  | (Bergo *et al.* 2016; Braga *et al.* 2011; Pastore *et al.* 2011) | Genus level | Yes |  |  | Yes | Yes |  |  |  |  |
| Africa | *Milicia excelsa* | No - G | (Bizoux *et al.* 2009; Dainou *et al.* 2010; Ouinsavi *et al.* 2009) |  |  |  | Yes |  | Genus level |  |  |  |  |  |  |  |  |  |
| Africa | *Milicia regia* |  |  |  |  |  |  |  | Genus level |  | Yes | Yes | Yes | Yes | Yes |  |  |  |
| Africa | *Millettia laurentii* |  |  |  |  |  | Yes |  | Genus level |  |  |  |  |  |  |  |  |  |
| Central- and South-America | *Minquartia guianensis* |  |  |  |  |  |  |  | Species level | Yes | Yes | Yes | Yes | Yes |  |  | Yes | Yes |
| Central- and South-America | *Myroxylon balsamum* |  |  |  |  |  |  |  | Genus level | Yes | Yes | Yes | Yes | Yes | Yes | Yes |  |  |
| Africa | *Nauclea diderrichii* |  |  |  |  |  | Yes |  | Species level |  |  |  |  |  |  |  |  |  |
| Asia, Pacific and Oceania | *Neolamarckia cadamba syn.: Anthocephalus cadamba2* |  |  |  |  |  |  |  | Genus level | Yes | Yes | Yes |  |  |  |  |  |  |
| Africa | *Ocotea usambarensis* |  |  |  |  |  |  |  | Genus level | Yes | Yes | Yes | Yes |  |  |  |  |  |
| Central- and South-America | *Ormosia spp.* |  |  |  |  |  |  |  | Genus level | Yes | Yes | Yes | Yes | Yes | Yes | Yes |  |  |
| Central- and South-America | *Pachira (Bombacopsis) quinata* |  |  |  |  |  |  |  | Genus level | Yes | Yes | Yes | Yes |  | Yes | Yes |  |  |
| Asia, Pacific and Oceania | *Palaquium spp.* |  |  |  |  |  |  |  | Genus level | Yes | Yes | Yes | Yes |  |  |  |  |  |
| Asia, Pacific and Oceania | *Parashorea lucida* |  |  |  |  |  |  |  | Genus level |  | Yes |  | Yes | Yes | Yes | Yes |  |  |
| Central- and South-America | *Peltogyne venosa* |  |  |  |  |  |  |  | Genus level |  | Yes | Yes | Yes | Yes | Yes | Yes |  |  |
| Africa | *Pericopsis elata* |  |  |  |  |  | Yes |  | Genus level |  | Yes |  |  |  |  |  |  |  |
| Europe | *Picea abies* | No - G  No - S  No - N | (Bínová *et al.* 2020; Vendramin *et al.* 2000) |  | (Gori *et al.* 2018) | (Sandak *et al.* 2011) |  |  | Genus level | Yes | Yes | Yes | Yes | Yes | Yes | Yes | Yes | Yes |
| Central- and South-America | *Pilgerodendron uviferum* |  |  |  |  |  | Yes |  | Species level |  | Yes | Yes | Yes | Yes | Yes |  |  |  |
| Europe | *Pinus cembra* | No - G | (Dzialuk *et al.* 2014; Gugerli *et al.* 2009; Hoehn *et al.* 2009) |  |  |  | Yes |  | Genus level | Yes | Yes | Yes | Yes | Yes |  |  | Yes | Yes |
| Asia, Pacific and Oceania | *Pinus kesiya* | No - G | (Rai and Ginwal 2018) |  |  |  |  |  | Genus level | Yes | Yes | Yes | Yes |  | Yes | Yes |  | Yes |
| Asia, Pacific and Oceania | *Pinus koraiensis* | No - G | (Feng *et al.* 2006; Li *et al.* 2021) |  |  |  | Yes |  | Genus level | Yes | Yes | Yes | Yes |  | Yes | Yes | Yes | Yes |
| Europe | *Pinus mugo* | No - G | (Dzialuk *et al.* 2014; Wachowiak *et al.* 2005; Zukowska and Wachowiak 2017) |  |  |  | Yes |  | Genus level | Yes | Yes | Yes | Yes | Yes | Yes | Yes | Yes | Yes |
| Africa, Europe | *Pinus nigra* | No - G | (Afzal-Rafii and Dodd 2007) |  |  |  | Yes |  | Genus level | Yes | Yes | Yes | Yes | Yes | Yes | Yes |  | Yes |
| Europe | *Pinus pinaster* | No - G | (Derory *et al.* 2002) |  |  |  |  |  | Genus level | Yes | Yes | Yes | Yes |  | Yes | Yes | Yes | Yes |
| Central- and South-America | *Pinus radiata* |  |  |  |  |  |  |  | Genus level |  | Yes | Yes | Yes |  | Yes | Yes | Yes | Yes |
| Asia, Pacific and Oceania | *Pinus roxburghii* |  |  |  |  |  | Yes |  | Genus level | Yes | Yes |  | Yes |  | Yes | Yes | Yes | Yes |
| Asia, Pacific and Oceania, Europe | *Pinus sylvestris* | Yes - G | (Dering *et al.* 2017; Hebda *et al.* 2017; Li *et al.* 2005; Nowakowska 2011; Padutov *et al.* 2021; Robledo-Arnuncio *et al.* 2004; Semerikov *et al.* 2014; Wojkiewicz *et al.* 2016) |  |  |  | Yes | (Brunner *et al.* 1996) | Genus level | Yes | Yes | Yes | Yes | Yes | Yes | Yes | Yes | Yes |
| Asia, Pacific and Oceania | *Pinus wallichiana* |  |  |  |  |  |  |  | Genus level | Yes | Yes | Yes | Yes |  | Yes | Yes |  | Yes |
| Africa | *Piptadeniastrum africanum* |  |  |  |  |  |  |  | Genus level |  | Yes | Yes | Yes |  | Yes | Yes | Yes | Yes |
| Central- and South-America | *Platymiscium pleiostachyum* |  |  |  |  |  |  |  | Genus level |  |  |  |  |  |  |  |  |  |
| Asia, Pacific and Oceania | *Podocarpus elatus* | No - G | (Mellick *et al.* 2011) |  |  |  |  |  | Genus level | Yes | Yes |  | Yes | Yes | Yes | Yes |  |  |
| Asia, Pacific and Oceania | *Podocarpus imbricatus* |  |  |  |  |  |  |  | Genus level | Yes | Yes | Yes | Yes | Yes | Yes | Yes |  | Yes |
| Asia, Pacific and Oceania | *Podocarpus neriifolius* |  |  |  |  |  | Yes |  | Genus level | Yes | Yes | Yes | Yes | Yes | Yes | Yes |  | Yes |
| Central- and South-America | *Podocarpus parlatorei* |  |  |  |  |  |  |  | Genus level | Yes | Yes |  | Yes |  | Yes | Yes |  |  |
| Asia, Pacific and Oceania | *Podophyllum hexandrum* |  |  |  |  |  |  |  | Genus level | Yes | Yes | Yes | Yes |  | Yes | Yes |  | Yes |
| Asia, Pacific and Oceania | *Pometia pinnata* |  |  |  |  |  |  |  | Genus level | Yes | Yes | Yes | Yes | Yes | Yes | Yes | Yes |  |
| Asia, Pacific and Oceania | *Populus adenopoda* |  |  |  |  |  |  |  | Genus level | Yes | Yes | Yes | Yes |  | Yes | Yes | Yes | Yes |
| Europe | *Populus alba* |  |  |  |  |  | Yes |  | Genus level | Yes | Yes | Yes | Yes | Yes | Yes | Yes | Yes | Yes |
| North-America | *Populus balsamifera* |  |  |  |  |  | Yes |  | Genus level | Yes | Yes | Yes |  | Yes | Yes |  | Yes | Yes |
| Asia, Pacific and Oceania | *Populus cathayana* | No - G | (Peng and Chen 2011; Peng *et al.* 2005) |  |  |  |  |  | Genus level | Yes | Yes | Yes |  |  | Yes |  | Yes | Yes |
| North-America | *Populus deltoides* |  |  |  |  |  | Yes |  | Genus level | Yes | Yes | Yes |  | Yes | Yes |  | Yes | Yes |
| Asia, Pacific and Oceania | *Populus euphratica* |  |  |  |  |  | Yes |  | Genus level | Yes | Yes | Yes | Yes |  | Yes | Yes | Yes | Yes |
| Central- and South-America, North America | *Populus fremontii* |  |  |  |  |  | Yes |  | Genus level |  | Yes |  | Yes | Yes | Yes |  | Yes | Yes |
| North-America | *Populus grandidentata* |  |  |  |  |  | Yes |  | Genus level | Yes | Yes | Yes | Yes |  |  |  | Yes | Yes |
| Asia, Pacific and Oceania | *Populus koreana* |  |  |  |  |  |  |  | Genus level | Yes | Yes | Yes | Yes | Yes |  |  | Yes |  |
| Asia, Pacific and Oceania | *Populus lasiocarpa* |  |  |  |  |  |  |  | Genus level | Yes | Yes | Yes | Yes |  | Yes | Yes | Yes | Yes |
| Asia, Pacific and Oceania | *Populus maximowiczii* |  |  |  |  |  |  |  | Genus level | Yes | Yes | Yes | Yes |  | Yes | Yes | Yes | Yes |
| Europe | *Populus nigra* |  |  |  |  |  | Yes |  | Genus level | Yes | Yes | Yes |  | Yes | Yes |  | Yes | Yes |
| Asia, Pacific and Oceania | *Populus simonii* | No - G | (Wei *et al.* 2013) |  |  |  |  |  | Genus level | Yes | Yes | Yes | Yes |  | Yes | Yes | Yes | Yes |
| Asia, Pacific and Oceania | *Populus szechuanica* |  |  |  |  |  |  |  | Genus level | Yes | Yes | Yes | Yes |  | Yes | Yes | Yes | Yes |
| Europe | *Populus tremula* |  | (Salvini *et al.* 2001; Svetlakova *et al.* 2014) |  |  |  | Yes |  | Genus level | Yes | Yes | Yes | Yes | Yes | Yes | Yes | Yes | Yes |
| Central- and South-America, North America | *Populus tremuloides* | No - G | (Callahan *et al.* 2013; Latutrie *et al.* 2016) |  |  |  | Yes |  | Genus level | Yes | Yes | Yes |  | Yes | Yes |  | Yes | Yes |
| North-America | *Populus trichocarpa* |  |  |  |  |  | Yes |  | Genus level | Yes | Yes | Yes |  | Yes |  |  | Yes | Yes |
| Asia, Pacific and Oceania | *Populus ussuriensis* |  |  |  |  |  |  |  | Genus level | Yes | Yes | Yes | Yes |  | Yes | Yes | Yes | Yes |
| Asia, Pacific and Oceania | *Populus wilsonii* |  |  |  |  |  |  |  | Genus level | Yes | Yes | Yes | Yes | Yes | Yes | Yes | Yes | Yes |
| Africa | *Pouteria altissima2 (previously Aningeria altissima)* |  |  |  |  |  |  |  | Genus level | Yes |  | Yes | Yes |  | Yes | Yes |  |  |
| Africa | *Pouteria robusta2 (previously Aningeria robusta)* |  |  |  |  |  |  |  | Genus level |  |  |  |  |  |  |  |  |  |
| Africa | *Pterocarpus angolensis* |  |  |  |  |  |  |  | Genus level | Yes | Yes |  | Yes |  | Yes | Yes |  |  |
| Asia, Pacific and Oceania | *Pterocarpus dalbergoides* |  |  |  |  |  | Yes |  | Genus level |  |  |  |  |  |  |  |  |  |
| Africa | *Pterocarpus erinaceus* |  |  |  |  |  | Yes |  | Genus level | Yes | Yes |  |  |  | Yes | Yes |  |  |
| Asia, Pacific and Oceania | *Pterocarpus indicus* |  |  |  |  |  | Yes |  | Genus level | Yes | Yes | Yes | Yes | Yes | Yes | Yes |  |  |
| Asia, Pacific and Oceania | *Pterocarpus macrocarpus* |  |  |  |  |  | Yes |  | Genus level | Yes | Yes | Yes | Yes |  | Yes | Yes |  |  |
| Asia, Pacific and Oceania | *Pterocarpus marsupium* |  |  |  |  |  | Yes |  | Genus level | Yes | Yes | Yes | Yes |  | Yes | Yes |  |  |
| Asia, Pacific and Oceania | *Pterocarpus santalinus* |  |  |  |  |  | Yes |  | Genus level | Yes | Yes | Yes | Yes |  | Yes | Yes |  | Yes |
| Africa | *Pterocarpus soyauxii2 (separated from Pterocarpus tinctorius)* |  |  |  |  |  | Yes |  | Genus level | Yes | Yes |  | Yes |  |  |  |  |  |
| Africa | *Pterocarpus tinctorius2 (separated from Ptercarpus soyauxii)* |  |  |  |  |  |  |  | Genus level |  |  |  |  |  |  |  |  |  |
| Africa | *Pterygota bequaertii* |  |  |  |  |  |  |  | Genus level |  | Yes |  | Yes |  |  |  |  |  |
| Central- and South-America | *Qualea spp.* |  |  |  |  |  |  |  | Genus level |  | Yes | Yes | Yes | Yes |  |  | Yes | Yes |
| North-America | *Quercus alba* |  |  |  |  |  |  |  | Genus level | Yes | Yes | Yes | Yes | Yes | Yes | Yes | Yes | Yes |
| North-America | *Quercus macrocarpa* |  |  |  |  |  |  |  | Genus level | Yes | Yes | Yes | Yes |  |  |  | Yes | Yes |
| Asia, Pacific and Oceania | *Quercus mongolica* |  |  |  |  |  | Yes | (Tsuchikawa *et al.* 2003) | Genus level | Yes | Yes | Yes | Yes | Yes | Yes | Yes | Yes |  |
| Europe | *Quercus petraea* | Yes - G | (Craciunesc *et al.* 2016; Lupini *et al.* 2019; Neophytou *et al.* 2010; Nowakowska 2011) |  |  |  | Yes |  | Genus level | Yes | Yes | Yes | Yes |  | Yes | Yes |  | Yes |
| Europe | *Quercus robur* | Yes - G | (Chokheli *et al.* 2018; Craciunesc *et al.* 2016; Neophytou *et al.* 2010; Nowakowska 2011) |  |  |  |  |  | Genus level | Yes | Yes | Yes | Yes | Yes | Yes | Yes | Yes | Yes |
| Asia, Pacific and Oceania, Central- and South-America, Europe, North-America | *Quercus spp.* | Yes - S  No - G | (Ashley *et al.* 2015; Chen *et al.* 2021; Di Pietro *et al.* 2021; Ju *et al.* 2019; Kitamura *et al.* 2017; Li *et al.* 2019; Ohsawa *et al.* 2011a; Ohsawa *et al.* 2011b; Ohsawa *et al.* 2007; Peñaloza-Ramírez *et al.* 2020; Suzuki Spence *et al.* 2021; Zorrilla-Azcue *et al.* 2021) |  | (Watkinson *et al.* 2020) |  |  |  | Genus level | Yes | Yes | Yes | Yes | Yes | Yes | Yes | Yes | Yes |
| Central- and South-America | *Roupala spp.* |  |  |  |  |  |  |  | Genus level | Yes | Yes | Yes | Yes | Yes | Yes |  |  |  |
| Central- and South-America | *Ruizterania albiflora syn.: Qualea albiflora* |  |  |  |  |  |  |  | Genus level |  | Yes | Yes | Yes | Yes |  |  | Yes | Yes |
| Asia, Pacific and Oceania | *Santalum album* |  |  |  |  |  |  |  | Genus level | Yes | Yes | Yes | Yes | Yes | Yes | Yes | Yes | Yes |
| Asia, Pacific and Oceania | *Santalum spp.* |  |  |  |  |  |  |  | Genus level | Yes | Yes |  | Yes |  |  |  | Yes |  |
| Central- and South-America | *Schlegelia parviflora2 (previously Tabebuia micrantha)* |  |  |  |  |  |  |  | Genus level |  |  |  |  |  |  |  |  |  |
| Central- and South-America | *Sextonia rubra* |  |  |  |  |  |  |  | Genus level | Yes | Yes | Yes | Yes | Yes | Yes | Yes | Yes | Yes |
| Asia, Pacific and Oceania | *Shorea acuminata* |  |  |  |  |  | Yes |  | Genus level |  | Yes | Yes | Yes | Yes | Yes | Yes | Yes |  |
| Asia, Pacific and Oceania | *Shorea acuminatissima* |  |  |  |  |  | Yes |  | Genus level | Yes | Yes | Yes | Yes | Yes | Yes | Yes | Yes |  |
| Asia, Pacific and Oceania | *Shorea agsaboensis* |  |  |  |  |  |  |  | Genus level |  |  |  |  |  |  |  |  |  |
| Asia, Pacific and Oceania | *Shorea assamica* |  |  |  |  |  | Yes |  | Genus level | Yes | Yes | Yes | Yes | Yes | Yes | Yes | Yes |  |
| Asia, Pacific and Oceania | *Shorea atrinervosa* |  |  |  |  |  | Yes |  | Genus level |  | Yes | Yes | Yes | Yes | Yes | Yes | Yes |  |
| Asia, Pacific and Oceania | *Shorea balangeran* |  |  |  |  |  | Yes |  | Genus level | Yes |  |  |  | Yes | Yes | Yes |  |  |
| Asia, Pacific and Oceania | *Shorea bracteolate* |  |  |  |  |  | Yes |  | Genus level |  |  |  |  |  |  |  |  |  |
| Asia, Pacific and Oceania | *Shorea brunnescens* |  |  |  |  |  |  |  | Genus level |  |  |  |  |  |  |  |  |  |
| Asia, Pacific and Oceania | *Shorea collina* |  |  |  |  |  | Yes |  | Genus level |  |  | Yes |  | Yes | Yes | Yes | Yes |  |
| Asia, Pacific and Oceania | *Shorea crassa* |  |  |  |  |  |  |  | Genus level |  | Yes | Yes | Yes | Yes | Yes | Yes |  |  |
| Asia, Pacific and Oceania | *Shorea curtisii* |  |  |  |  |  | Yes |  | Genus level |  | Yes | Yes |  | Yes | Yes | Yes | Yes |  |
| Asia, Pacific and Oceania | *Shorea dasyphylla* |  |  |  |  |  | Yes |  | Genus level |  | Yes | Yes |  | Yes | Yes | Yes | Yes |  |
| Asia, Pacific and Oceania | *Shorea dealbata* |  |  |  |  |  | Yes |  | Genus level | Yes |  |  |  |  |  |  |  |  |
| Asia, Pacific and Oceania | *Shorea exelliptica* |  |  |  |  |  |  |  | Genus level | Yes | Yes |  | Yes | Yes | Yes | Yes | Yes |  |
| Asia, Pacific and Oceania | *Shorea faguetiana* |  |  |  |  |  | Yes |  | Genus level | Yes |  | Yes | Yes | Yes | Yes | Yes | Yes |  |
| Asia, Pacific and Oceania | *Shorea farinosa* |  |  |  |  |  | Yes |  | Genus level |  |  |  |  |  |  |  |  |  |
| Asia, Pacific and Oceania | *Shorea foxworthyi* |  |  |  |  |  | Yes |  | Genus level | Yes |  | Yes |  | Yes | Yes | Yes | Yes |  |
| Asia, Pacific and Oceania | *Shorea gibbosa* |  |  |  |  |  | Yes |  | Genus level |  | Yes | Yes | Yes | Yes | Yes | Yes | Yes |  |
| Asia, Pacific and Oceania | *Shorea glauca* |  |  |  |  |  | Yes |  | Genus level |  |  |  |  | Yes |  |  | Yes |  |
| Asia, Pacific and Oceania | *Shorea guiso* | No - G | (Tinio *et al.* 2014) |  |  |  | Yes |  | Species level | Yes | Yes | Yes | Yes | Yes | Yes | Yes | Yes |  |
| Asia, Pacific and Oceania | *Shorea havilandii* |  |  |  |  |  |  |  | Genus level | Yes | Yes | Yes | Yes | Yes | Yes | Yes |  |  |
| Asia, Pacific and Oceania | *Shorea hemsleyana* |  |  |  |  |  | Yes |  | Genus level |  |  |  |  | Yes |  |  | Yes |  |
| Asia, Pacific and Oceania | *Shorea hopeifolia* |  |  |  |  |  | Yes |  | Genus level | Yes | Yes |  | Yes | Yes | Yes | Yes |  |  |
| Asia, Pacific and Oceania | *Shorea hypochra* |  |  |  |  |  | Yes |  | Genus level |  |  |  |  |  |  |  |  |  |
| Asia, Pacific and Oceania | *Shorea javanica* | No - G | (Rachmat *et al.* 2012) |  |  |  | Yes |  | Genus level | Yes |  | Yes |  | Yes | Yes | Yes |  |  |
| Asia, Pacific and Oceania | *Shorea johorensis* |  |  |  |  |  |  |  | Genus level | Yes | Yes | Yes | Yes | Yes | Yes | Yes |  |  |
| Asia, Pacific and Oceania | *Shorea kunstleri* |  |  |  |  |  | Yes |  | Genus level | Yes | Yes | Yes |  | Yes | Yes | Yes | Yes |  |
| Asia, Pacific and Oceania | *Shorea laevis* |  |  |  |  |  | Yes |  | Species level | Yes | Yes | Yes | Yes | Yes | Yes | Yes | Yes |  |
| Asia, Pacific and Oceania | *Shorea lamellate* |  |  |  |  |  | Yes |  | Genus level |  |  |  |  |  |  |  |  |  |
| Asia, Pacific and Oceania | *Shorea lepidota* |  |  |  |  |  | Yes |  | Genus level |  |  | Yes |  | Yes | Yes | Yes | Yes |  |
| Asia, Pacific and Oceania | *Shorea leprosula* | No - G  No - S | (Ohtani *et al.* 2013) |  | (Kagawa *et al.* 2007) |  | Yes |  | Species level | Yes | Yes | Yes | Yes | Yes | Yes | Yes | Yes |  |
| Asia, Pacific and Oceania | *Shorea leptoderma* |  |  |  |  |  |  |  | Genus level |  |  |  |  |  |  |  |  |  |
| Asia, Pacific and Oceania | *Shorea longipetala* |  |  |  |  |  |  |  | Genus level |  |  |  |  |  |  |  |  |  |
| Asia, Pacific and Oceania | *Shorea macrantha* |  |  |  |  |  | Yes |  | Genus level |  |  |  |  | Yes |  |  | Yes |  |
| Asia, Pacific and Oceania | *Shorea macroptera* |  |  |  |  |  | Yes |  | Genus level | Yes | Yes | Yes | Yes | Yes | Yes | Yes | Yes |  |
| Asia, Pacific and Oceania | *Shorea materialis* |  |  |  |  |  | Yes |  | Genus level | Yes |  | Yes |  | Yes | Yes | Yes | Yes |  |
| Asia, Pacific and Oceania | *Shorea maxwelliana* |  |  |  |  |  | Yes |  | Genus level | Yes |  | Yes |  | Yes | Yes | Yes | Yes |  |
| Asia, Pacific and Oceania | *Shorea multiflora* |  |  |  |  |  | Yes |  | Genus level | Yes | Yes |  |  | Yes | Yes | Yes | Yes |  |
| Asia, Pacific and Oceania | *Shorea obtusa* | No - G | (Senakun *et al.* 2011) |  |  |  | Yes |  | Genus level |  | Yes |  | Yes |  |  |  |  |  |
| Asia, Pacific and Oceania | *Shorea ochrophloia* |  |  |  |  |  | Yes |  | Genus level |  | Yes | Yes |  | Yes | Yes | Yes | Yes |  |
| Asia, Pacific and Oceania | *Shorea ovata* |  |  |  |  |  | Yes |  | Genus level | Yes | Yes | Yes | Yes | Yes | Yes | Yes | Yes |  |
| Asia, Pacific and Oceania | *Shorea parvifolia* |  |  |  |  |  | Yes |  | Genus level | Yes | Yes | Yes | Yes | Yes | Yes | Yes | Yes |  |
| Asia, Pacific and Oceania | *Shorea pauciflora* | No - S |  |  | (Kagawa *et al.* 2007) |  | Yes |  | Genus level | Yes | Yes | Yes |  | Yes | Yes | Yes | Yes |  |
| Asia, Pacific and Oceania | *Shorea platyclados* | Yes - G | (Ng *et al.* 2017) |  |  |  | Yes |  | Genus level |  |  | Yes | Yes | Yes | Yes | Yes | Yes |  |
| Asia, Pacific and Oceania | *Shorea robusta* |  |  |  |  |  | Yes |  | Genus level | Yes | Yes | Yes | Yes |  | Yes | Yes |  |  |
| Asia, Pacific and Oceania | *Shorea rugosa var. vuliginosa* |  |  |  |  |  | Yes |  | Genus level |  |  |  |  |  |  |  |  |  |
| Asia, Pacific and Oceania | *Shorea seminis* |  |  |  |  |  | Yes |  | Genus level | Yes | Yes | Yes |  | Yes | Yes | Yes | Yes |  |
| Asia, Pacific and Oceania | *Shorea singkawang* |  |  |  |  |  | Yes |  | Genus level | Yes | Yes | Yes |  | Yes | Yes | Yes | Yes |  |
| Asia, Pacific and Oceania | *Shorea submontana* |  |  |  |  |  |  |  | Genus level |  |  |  |  |  |  |  |  |  |
| Asia, Pacific and Oceania | *Shorea sumatrana* |  |  |  |  |  |  |  | Genus level |  |  | Yes |  | Yes | Yes | Yes | Yes |  |
| Asia, Pacific and Oceania | *Shorea superba* |  |  |  |  |  | Yes |  | Genus level |  |  | Yes |  | Yes | Yes | Yes | Yes |  |
| Central- and South-America | *Simarouba amara* | No - G | (Hardesty *et al.* 2010) |  |  |  |  |  | Genus level |  |  |  |  |  |  |  |  |  |
| Europe | *Sorbus torminalis* |  |  |  |  |  |  |  | Genus level | Yes | Yes | Yes | Yes | Yes |  |  |  |  |
| Central- and South-America | *Swartzia spp.* |  |  |  |  |  |  |  | Genus level | Yes | Yes | Yes | Yes | Yes | Yes | Yes | Yes | Yes |
| Central- and South-America | *Swietenia humilis* |  |  |  |  |  | Yes |  | Genus level | Yes |  | Yes |  |  |  |  | Yes | Yes |
| Central- and South-America | *Swietenia macrophylla* | Yes - G  Yes - N | (Degen *et al.* 2013; Ernesto Alcala *et al.* 2015; Lemes *et al.* 2010) |  |  | (Silva *et al.* 2018) | Yes | (Bergo *et al.* 2016; Braga *et al.* 2011; Pastore *et al.* 2011; Silva *et al.* 2018; Soares *et al.* 2017) | Genus level | Yes | Yes | Yes | Yes | Yes | Yes | Yes | Yes | Yes |
| Central- and South-America | *Swietenia mahagoni* |  |  |  |  |  | Yes |  | Genus level | Yes | Yes | Yes | Yes |  | Yes | Yes | Yes | Yes |
| Asia, Pacific and Oceania | *Swintonia spp.* |  |  |  |  |  |  |  | Genus level |  | Yes |  | Yes | Yes |  | Yes |  |  |
| Central- and South-America | *Tabebuia aurea* | No - G | (Collevatti *et al.* 2020) |  |  |  |  |  | Genus level | Yes | Yes | Yes | Yes |  | Yes | Yes |  |  |
| Central- and South-America | *Tabebuia pilosa* |  |  |  |  |  |  |  | Genus level |  |  |  |  |  |  |  |  |  |
| Central- and South-America | *Tabebuia rosea* |  |  |  |  |  |  |  | Genus level | Yes | Yes | Yes | Yes |  | Yes | Yes |  |  |
| Asia, Pacific and Oceania | *Taxus baccata* | No - G | (Dubreuil *et al.* 2010; Litkowiec *et al.* 2015; Maroso *et al.* 2021) |  |  |  |  |  | Genus level | Yes | Yes | Yes | Yes |  | Yes | Yes | Yes | Yes |
| Asia, Pacific and Oceania | *Taxus chinensis* | No - G | (Dinh-Duy *et al.* 2017; Wu *et al.* 2019) |  |  |  | Yes |  | Genus level | Yes | Yes | Yes | Yes |  | Yes | Yes | Yes | Yes |
| Asia, Pacific and Oceania | *Taxus cuspidata* |  |  |  |  |  | Yes |  | Genus level | Yes | Yes | Yes | Yes |  | Yes | Yes | Yes | Yes |
| Asia, Pacific and Oceania | *Taxus fuana* |  |  |  |  |  |  |  | Genus level | Yes | Yes | Yes | Yes |  | Yes | Yes |  | Yes |
| Asia, Pacific and Oceania | *Taxus sumatrana* |  |  |  |  |  |  |  | Genus level | Yes | Yes | Yes | Yes |  | Yes | Yes |  | Yes |
| Asia, Pacific and Oceania | *Taxus wallichiana* | No - G | (Dinh Duy *et al.* 2017; Poudel *et al.* 2014; Zhang and Zhou 2013) |  |  |  | Yes |  | Genus level | Yes | Yes | Yes | Yes |  | Yes | Yes | Yes | Yes |
| Asia, Pacific and Oceania, Africa | *Tectona grandis* | No - G | (Balakrishnan *et al.* 2021; Minn *et al.* 2014) |  |  |  | Yes | (Tsuchikawa *et al.* 2003) | Species level | Yes | Yes | Yes | Yes |  | Yes | Yes | Yes |  |
| Asia, Pacific and Oceania | *Terminalia arjuna* |  |  |  |  |  |  |  | Genus level | Yes | Yes | Yes | Yes |  |  |  |  |  |
| Asia, Pacific and Oceania | *Terminalia chebula* |  |  |  |  |  |  |  | Genus level | Yes | Yes | Yes | Yes |  |  |  |  | Yes |
| Africa | *Terminalia ivorensis* |  |  |  |  |  |  |  | Species level | Yes |  | Yes | Yes |  |  |  |  |  |
| Asia, Pacific and Oceania | *Terminalia manii* |  |  |  |  |  |  |  | Genus level |  |  |  |  |  |  |  |  |  |
| Asia, Pacific and Oceania | *Terminalia myriocarpa* |  |  |  |  |  |  |  | Genus level | Yes | Yes | Yes | Yes |  |  |  |  |  |
| Africa | *Terminalia superba* | Yes - D |  | (Deklerck *et al.* 2020) |  |  | Yes |  | Species level | Yes | Yes | Yes | Yes |  |  |  |  |  |
| Africa | *Tetraberlinia tubmaniana* |  |  |  |  |  |  |  | Genus level |  |  |  |  |  |  |  |  |  |
| Asia, Pacific and Oceania | *Tetracentron sinense* |  |  |  |  |  |  |  | Species level | Yes | Yes | Yes | Yes | Yes | Yes | Yes |  |  |
| Asia, Pacific and Oceania | *Tetramerista glabra* |  |  |  |  |  |  |  | Species level |  |  |  |  |  |  |  |  |  |
| Central- and South-America | *Tipuana tipu* |  |  |  |  |  |  |  | Species level | Yes | Yes |  | Yes | Yes | Yes | Yes |  |  |
| Asia, Pacific and Oceania | *Toona ciliata* | No - G | (Liu *et al.* 2014; Zhan *et al.* 2019) |  |  |  |  |  | Genus level | Yes | Yes | Yes | Yes |  | Yes | Yes | Yes | Yes |
| Asia, Pacific and Oceania | *Toona sureni* |  |  |  |  |  |  |  | Genus level | Yes |  | Yes | Yes |  |  |  |  |  |
| Africa | *Triplochiton scleroxylon* |  |  |  |  |  | Yes | (Ma *et al.* 2019) | Species level |  |  |  |  |  |  |  |  |  |
| Central- and South-America | *Virola spp.* |  |  |  |  |  |  |  | Genus level |  | Yes | Yes | Yes | Yes | Yes | Yes | Yes | Yes |
| Central- and South-America | *Virola surinamensis* |  |  |  |  |  |  |  | Genus level |  | Yes | Yes |  | Yes | Yes | Yes |  |  |
| Africa | *Vitex keniensis* |  |  |  |  |  |  |  | Genus level |  |  |  | Yes |  |  |  |  |  |
| Asia, Pacific and Oceania | *Vitex pinnata* |  |  |  |  |  |  |  | Genus level | Yes | Yes | Yes | Yes |  |  |  |  |  |
| Asia, Pacific and Oceania | *Vitex spp.* |  |  |  |  |  |  |  | Genus level | Yes | Yes | Yes | Yes | Yes | Yes | Yes |  | Yes |
| Central- and South-America | *Vouacapoua americana* |  |  |  |  |  |  |  | Genus level | Yes | Yes | Yes | Yes | Yes | Yes | Yes | Yes | Yes |
| Africa | *Widdringtonia whytei* |  |  |  |  |  |  |  | Family level |  | Yes |  | Yes | Yes |  |  |  |  |
| Asia, Pacific and Oceania | *Xylia xylocarpa* |  |  |  |  |  |  |  | Genus level |  | Yes |  |  |  |  |  |  |  |

Taxa that do not have an entry in the assignment test column did not appear in studies retrieved in the literature search.

1Grouped together as one species under *Erythrophleum ivorense* in analysis as per priority species list

2Entry updated based on the Catalogue of Life (https://www.catalogueoflife.org/)

**References**

Afzal-Rafii Z, Dodd RS. 2007. Chloroplast DNA supports a hypothesis of glacial refugia over postglacial recolonization in disjunct populations of black pine (*Pinus nigra*) in western Europe. *Mol. Ecol*. 16(4): 723–736. DOI: 10.1111/j.1365-294X.2006.03183.x.

Andrianoelina O, Favreau B, Ramamonjisoa L, Bouvet JM. 2009. Small effect of fragmentation on the genetic diversity of *Dalbergia monticola*, an endangered tree species of the eastern forest of Madagascar, detected by chloroplast and nuclear microsatellites. *Ann. Bot*. 104(6): 1231–1242. DOI: 10.1093/aob/mcp231.

Antiqueira L, Souza R, Bajay MM, Kageyama PY. 2014. Genetic structure and diversity of *Copaifera Langsdorffii* desf. In Cerrado fragments of the Sao Paulo state, Brazil. *Rev. Arvore*. 38(4): 667–675. DOI: 10.1590/s0100-67622014000400010.

Ashley MV, Abraham ST, Backs JR, Koenig WD. 2015. Landscape genetics and population structure in Valley Oak (*Quercus lobata* Nee). *Am. J. Bot*. 102(12): 2124–2131. DOI: 10.3732/ajb.1500182.

Balakrishnan S, Dev SA, Sakthi AR, Vikashini B, Bhasker T R, Magesh NS, Ramasamy Y. 2021. Gene-ecological zonation and population genetic structure of *Tectona grandis* L.f. in India revealed by genome-wide SSR markers. *Tree Genet. Genomes* 17(4): 33. DOI: 10.1007/s11295-021-01514-x.

Bergo MCJ, Pastore TCM, Coradin VTR, Wiedenhoeft AC, Braga JWB. 2016. NIRS identification of *Swietenia macrophylla* is robust across specimens from 27 countries. *IAWA J*. 37(3): 420–430. DOI: 10.1163/22941932-20160144.

Bijarpasi MM, Müller M, Gailing O. 2020. Genetic diversity and structure of Oriental and European beech populations from Iran and Europe. *Silvae Genet*. 69(1): 55–62. DOI: 10.2478/sg-2020-0008.

Bínová Z, Korecký J, Dvořák J, Bílý J, Zádrapová D, Jansa V, Lstibůrek M. 2020. Genetic structure of Norway spruce ecotypes studied by SSR markers. *Forests* 11(1): 110. DOI: 10.3390/f11010110.

Bizoux JP, Dainou K, Bourland N, Hardy OJ, Heuertz M, Mahy G, Doucet JL. 2009. Spatial genetic structure in *Milicia excelsa* (Moraceae) indicates extensive gene dispersal in a low-density wind-pollinated tropical tree. *Mol. Ecol*. 18(21): 4398–4408. DOI: 10.1111/j.1365-294X.2009.04365.x.

Blanc-Jolivet C, Yanbaev Y, Kersten B, Degen B. 2018. A set of SNP markers for timber tracking of *Larix* spp. in Europe and Russia. *Forestry* 91(5): 614–628. DOI: 10.1093/forestry/cpy020.

Bocanegra-Gonzalez KT, Thomas E, Guillemin M-L, de Carvalho D, Gutierrez JP, Alcazar Caicedo C, Moscoso Higuita LG, Becerra LA, Gonzalez MA. 2018. Genetic diversity of *Ceiba pentandra* in Colombian seasonally dry tropical forest: Implications for conservation and management. *Biol. Conserv*. 227: 29–37. DOI: 10.1016/j.biocon.2018.08.021.

Braga JWB, Pastore TCM, Coradin VTH, Camargos JAA, da Silva JR. 2011. The use of near infrared spectroscopy to identify solid wood specimens of *Swietenia macrophylla* (CITES Appendix II). *IAWA J*. 32: 285–296. DOI: 10.1163/22941932-90000058.

Brunner M, Eugster R, Trenka E, Bergamin-Strotz L. 1996. FT-NIR spectroscopy and wood identification. *Holzforschung* 50(2): 130–134. DOI: 10.1515/hfsg.1996.50.2.130.

Callahan CM, Rowe CA, Ryel RJ, Shaw JD, Madritch MD, Mock KE. 2013. Continental-scale assessment of genetic diversity and population structure in quaking aspen (*Populus tremuloides*). *J. Biogeogr*. 40(9): 1780–1791. DOI: 10.1111/jbi.12115.

Chaves CL, Degen B, Pakull B, Mader M, Honorio E, Ruas P, Tysklind N, Sebbenn AM. 2018. Assessing the ability of chloroplast and nuclear DNA gene markers to verify the geographic origin of Jatoba (*Hymenaea courbaril* L.) timber. *J. Hered*. 109(5): 543–552. DOI: 10.1093/jhered/esy017.

Chen X-D, Yang J, Guo Y-F, Zhao Y-M, Zhou T, Zhang X, Ju M-M, Li Z-H, Zhao G-F. 2021. Spatial genetic structure and demographic history of the dominant forest oak *Quercus fabri* Hance in subtropical China. *Front. Plant Sci*. 11(2278). DOI: 10.3389/fpls.2020.583284.

Chokheli V, Kagan D, Rajput V, Kozlovsky B, Sereda M, Shmaraeva A, Khibuhina T, Fedyaeva V, Shishlova Z, Dmitriev P, *et al*. 2018. Genetic Variability in Cenopopulations of Pedunculate Oak (*Quercus robur*) in Rostov Region, Russia, with the Use of ISSR-Markers. *Int. J. Agric. Biol*. 20(11): 2544–2548. DOI: 10.17957/ijab/15.0802.

Collevatti RG, dos Santos JS, Rosa FF, Amaral TS, Chaves LJ, Ribeiro MC. 2020. Multi-scale landscape influences on genetic diversity and adaptive traits in a neotropical savanna tree. *Front. Genet*. 11. DOI: 10.3389/fgene.2020.00259.

Craciunesc I, Curtu AL, Sofletea N. 2016. Genetic diversity and differentiation among four *Quercus robur* and Q*. petraea* natural populations in Romania. Bulletin of the Transilvania University of Brasov, Series II - Forestry, Wood Industry, *Agric. Food Eng*. 9(58 Part 2): 7–16.

Cramm M, Van Brusselen J. 2019. *List of priority tree species for the development of reference data for determination of tree species and their geographic origin. Update of the GTTN priority tree species list of 2013*. Global Timber Tracking Network, European Forest Institute, Joensuu, available online at https://globaltimbertrackingnetwork.org/portfolios/priority-tree-species/.

Dainou K, Bizoux J-P, Doucet J-L, Mahy G, Hardy OJ, Heuertz M. 2010. Forest refugia revisited: nSSRs and cpDNA sequences support historical isolation in a wide-spread African tree with high colonization capacity, *Milicia excelsa* (Moraceae). *Mol. Ecol*. 19(20): 4462–4477. DOI: 10.1111/j.1365-294X.2010.04831.x.

Dayanandan S, Ashton PS, Williams SM, Primack RB. 1999. Phylogeny of the tropical tree family Dipterocarpaceae based on nucleotide sequences of the chloroplast rbcL gene. *Am. J. Bot*. 86(8): 1182–1190. DOI: 10.2307/2656982.

de Dato GD, Teani A, Mattioni C, Aravanopoulos F, Avramidou EV, Stojnic S, Ganopoulos I, Belletti P, Ducci F. 2020. Genetic analysis by nuSSR markers of Silver Birch (*Betula pendula* Roth) populations in their southern European distribution range. *Front. Plant Sci*. 11(310). DOI: 10.3389/fpls.2020.00310.

de Sousa VA, Reeves PA, Reilley A, de Aguiar AV, Stefenon VM, Richards CM. 2020. Genetic diversity and biogeographic determinants of population structure in *Araucaria angustifolia* (Bert.) O. Ktze. *Conserv. Genet.* 21(2): 217–229. DOI: 10.1007/s10592-019-01242-9.

Degen B, Blanc-Jolivet C, Stierand K, Gillet E. 2017. A nearest neighbour approach by genetic distance to the assignment of individual trees to geographic origin. *Forensic Sci. Int. Genet*. 27: 132–141. DOI: 10.1016/j.fsigen.2016.12.011.

Degen B, Ward SE, Lemes MR, Navarro C, Cavers S, Sebbenn AM. 2013. Verifying the geographic origin of mahogany (*Swietenia macrophylla* King) with DNA-fingerprints. *Forensic Sci. Int. Genet*. 7(1): 55–62. DOI: 10.1016/j.fsigen.2012.06.003.

Deklerck V, Lancaster CA, Van Acker J, Espinoza EO, Van den Bulcke J, Beeckman H. 2020. Chemical fingerprinting of wood sampled along a pith-to-bark gradient for individual comparison and provenance identification. *Forests* 11(1):107. DOI: 10.3390/f11010107.

Dering M, Kosiński P, Wyka TP , Pers-Kamczyc E, Boratyński A, Boratyńska K, Reich PB , Romo A, Zadworny M, Żytkowiak R, Oleksyn J. 2017. Tertiary remnants and Holocene colonizers: Genetic structure and phylogeography of Scots pine reveal higher genetic diversity in young boreal than in relict Mediterranean populations and a dual colonization of Fennoscandia. *Biodivers. Res*. 23(5): 540−555. DOI: 10.1111/ddi.12546.

Derory J, Mariette S, Gonzalez-Martinez SC, Chagne D, Madur D, Gerber S, Brach J, Persyn F, Ribeiro MM, Plomion C. 2002. What can nuclear microsatellites tell us about maritime pine genetic resources conservation and provenance certification strategies? *Ann. For. Sci*. 59(5–6): 699–708. DOI: 10.1051/forest:2002058.

Di Pietro R, Conte AL, Di Marzio P, Fortini P, Farris E, Gianguzzi L, Müller M, Rosati L, Spampinato G, Gailing O. 2021. Does the genetic diversity among pubescent white oaks in southern Italy, Sicily and Sardinia islands support the current taxonomic classification? *Eur. J. For. Res*. 140(2): 355–371. DOI: 10.1007/s10342-020-01334-z.

Dinh-Duy V, Thi Tuyet-Xuan B, Minh-Duc N, Shah SNM, Dinh-Giap V, Zhang Y, Minh-Tam N, Huang X-H. 2019. Genetic diversity and conservation of two threatened dipterocarps (Dipterocarpaceae) in southeast Vietnam. *J. For. Res*. 30(5): 1823–1831. DOI: 10.1007/s11676-018-0735-1.

Dinh Duy V, Thi Tuyet Xuan B, Minh Tam N, Dinh Giap V, Minh Duc N, Van Thang B, Huang X, Zhang Y. 2017. Genetic diversity in two threatened species in Vietnam: *Taxus chinensis* and *Taxus wallichiana*. *J. For. Res*. 28(2): 265–272. DOI: 10.1007/s11676-016-0323-1.

Diway BM, Lai Pei S, Lee Soon L, Ng K, Chong L. 2015. The use of DNA to infer the identification and geographical origin of Ramin species in Sarawak. In *Proceedings of the 17th Malaysian Forestry Conference, A Century of Forest Management: Lessons Learnt and the Way Forward, Kota Kinabalu, Sabah, Malaysia, 11th -12th November, 2014*: 466–471.

Donkpegan ASL, Piñeiro R, Heuertz M, Duminil J, Daïnou K, Doucet JL, Hardy OJ. 2020. Population genomics of the widespread African savannah trees *Afzelia africana* and *Afzelia quanzensis* reveals no significant past fragmentation of their distribution ranges. *Am. J. Bot*. 107(3): 498–509. DOI: 10.1002/ajb2.1449.

Dubreuil M, Riba M, Gonzalez-Martinez SC, Vendramin GG, Sebastiani F, Mayol M. 2010. Genetic effects of chronic habitat fragmentation revisited: strong genetic structure in a temperate tree, *Taxus baccata* (Taxaceae), with great dispersal capability. *Am. J. Bot*. 97(2): 303–310. DOI: 10.3732/ajb.0900148.

Duminil J, Heuertz M, Doucet JL, Bourland N, Cruaud C, Gavory F, Doumenge C, Navascues M, Hardy OJ. 2010. CpDNA-based species identification and phylogeography: application to African tropical tree species. *Mol. Ecol*. 19(24): 5469–5483. DOI: 10.1111/j.1365-294X.2010.04917.x.

Dzialuk A, Chybicki I, Gout R, Maczka T, Fleischer P, Konrad H, Curtu AL, Sofletea N, Valadon A. 2014. No reduction in genetic diversity of Swiss stone pine (*Pinus cembra* L.) in Tatra Mountains despite high fragmentation and small population size. *Conserv. Genet*. 15(6): 1433–1445. DOI: 10.1007/s10592-014-0628-6.

Ernesto Alcala R, De la Cruz S, Gutierrez-Granados G. 2015. Genetic structure and genetic diversity of *swietenia macrophylla* in areas subjected to selective logging in Quintana roo, Mexico. *Bot. Sci.* 93(4): 819–828. DOI: 10.17129/botsci.256.

Espinoza EO, Lancaster CA, Kreitals NM, Hata M, Cody RB, Blanchette RA. 2014. Distinguishing wild from cultivated agarwood (*Aquilaria* spp.) using direct analysis in real time and time of-flight mass spectrometry. *Rapid Commun. Mass Spectrometr.* 28(3): 281–289. DOI: 10.1002/rcm.6779.

Fatma NAH, Wickneswari R, Cannon CH. 2011. Detection of genetic structure among Ramin (*Gonystylus bancanus* (miq.) Kurz) populations in Peninsular Malaysia using a rapid DNA fingerprinting technique. Malays. *Appl. Biol*. 40(2): 43–50.

Feng F-j, Han S-j, Wang H-m. 2006. Genetic diversity and genetic differentiation of natural *Pinus koraiensis* population. *J. For. Res*. 17(1): 21–24. DOI: 10.1007/s11676-006-0005-5.

Gaoue OG, Lemes MR, Ticktin T, Sinsin B, Eyog-Matig O. 2014. Non-timber forest product harvest does not affect the genetic diversity of a tropical tree despite negative effects on population fitness. *Biotropica* 46(6): 756–762. DOI: 10.1111/btp.12145.

Gori Y, Stradiotti A, Camin F. 2018. Timber isoscapes. A case study in a mountain area in the Italian Alps. *PLoS ONE* 13(2): e0192970. DOI: 10.1371/journal.pone.0192970.

Gugerli F, Rueegg M, Vendramin GG. 2009. Gradual decline in genetic diversity in Swiss stone pine populations (*Pinus cembra*) across Switzerland suggests postglacial re-colonization into the Alps from a common eastern glacial refugium. *Bot. Helv*. 119(1): 13–22. DOI: 10.1007/s00035-009-0052-6.

Hardesty BD, Dick CW, Hamrick JL, Degen B, Hubbell SP, Bermingham E. 2010. Geographic influence on genetic structure in the widespread neotropical tree *Simarouba amara* (Simaroubaceae): landscape genetic diversity of *Simarouba amara*. *Trop. Plant Biol*. 3(1): 28–39. DOI: 10.1007/s12042-010-9044-3.

Hartvig I, So T, Changtragoon S, Hoa Thi T, Bouamanivong S, Theilade I, Kjaer ED, Nielsen LR. 2018. Population genetic structure of the endemic rosewoods *Dalbergia cochinchinensis* and *D. oliveri* at a regional scale reflects the Indochinese landscape and life-history traits. *Ecol. Evol*. 8(1): 530–545. DOI: 10.1002/ece3.3626.

Hebda A, Wojkiewicz B, Wachowiak W. 2017. Genetic characteristics of Scots pine in Poland and reference populations based on nuclear and chloroplast microsatellite markers. *Silva Fenn*. 51(2). DOI: 10.14214/sf.1721.

Hebel I, Haas R, Dounavi A. 2006. Genetic variation of common ash (*Fraxinus excelsior* L.) populations from provenance regions in southern Germany by using nuclear and chloroplast microsatellites. *Silvae Genet*. 55(1): 38–44. DOI: 10.1515/sg-2006-0006.

Heuertz M, Hausman JF, Hardy OJ, Vendramin GG, Frascaria-Lacoste N, Vekemans X. 2004. Nuclear microsatellites reveal contrasting patterns of genetic structure between western and southeastern European populations of the common ash (*Fraxinus excelsior* L.). *Evolution* 58(5): 976–988. DOI: 10.1111/j.0014-3820.2004.tb00432.x.

Hirata M, Mitsuyuki C, Moritsuka E, Chhang P, Tagane S, Toyama H, Sokh H, Rueangruea S, Suddee S, Suyama Y *et al*. 2021. Evaluating the genetic diversity in two tropical leguminous trees, *Dalbergia cochinchinensis* and *D. nigrescens*, in lowland forests in Cambodia and Thailand using MIG-seq. *Genes Genet. Syst*. 96(1): 41–53. DOI: 10.1266/ggs.20-00026.

Hoehn M, Gugerli F, Abran P, Bisztray G, Buonamici A, Cseke K, Hufnagel L, Quintela-Sabaris C, Sebastiani F, Vendramin GG. 2009. Variation in the chloroplast DNA of Swiss stone pine (*Pinus cembra* L.) reflects contrasting post-glacial history of populations from the Carpathians and the Alps. *J. Biogeogr*. 36(9): 1798–1806. DOI: 10.1111/j.1365-2699.2009.02122.x.

Honorio Coronado EN, Blanc-Jolivet C, Mader M, García-Dávila CR, Aldana Gomero D, del Castillo Torres D, Flores Llampazo G, Hidalgo Pizango G, Sebbenn AM, Meyer-Sand BRV *et al*. 2020. SNP markers as a successful molecular tool for assessing species identity and geographic origin of trees in the economically important South American legume genus *Dipteryx*. *J. Hered*. 111: 346–356. DOI: 10.1093/jhered/esaa011.

Hu L-J, Uchiyama K, Saito Y, Ide Y. 2010. Contrasting patterns of nuclear microsatellite genetic structure of *Fraxinus mandshurica* var. *japonica* between northern and southern populations in Japan. *J. Biogeogr*. 37(6): 1131–1143. DOI: 10.1111/j.1365-2699.2010.02275.x.

Hu L-J, Uchiyama K, Shen H-L, Saito Y, Tsuda Y, Ide Y. 2008. Nuclear DNA microsatellites reveal genetic variation but a lack of phylogeographical structure in an endangered species, *Fraxinus mandshurica*, across north-east China. *Ann. Bot*. 102(2): 195–205. DOI: 10.1093/aob/mcn074.

Janfaza S, Yousefzadeh H, Nasr SMH, Botta R, Abkenar AA, Marinon DT. 2017. Genetic diversity of *Castanea sativa* an endangered species in the Hyrcanian forest. *Silva Fenn*. 51(1). DOI: 10.14214/sf.1705.

Jayakumar KS, Sajan JS, Nair RA, Pillai PP, Deepu S, Padmaja R, Agarvval A, Pandurangan AG. 2014. Corosolic acid content and SSR markers in *Lagerstroemia speciosa* (L.) Pers.: A comparative analysis among populations across the Southern Western Ghats of India. *Phytochemistry* 106: 94–103. DOI: 10.1016/j.phytochem.2014.07.004.

Jolivet C, Degen B. 2012. Use of DNA fingerprints to control the origin of sapelli timber (*Entandrophragma cylindricum*) at the forest concession level in Cameroon. *Forensic Sci. Int. Genet*. 6(4): 487–493. DOI: 10.1016/j.fsigen.2011.11.002.

Ju M-M, Feng L, Yang J, Yang Y-C, Chen X-D, Zhao G-F. 2019. Evaluating population genetic structure and demographic history of *Quercus spinosa* (Fagaceae) based on specific length amplified fragment sequencing. *Front. Genet*. 10(965). DOI: 10.3389/fgene.2019.00965.

Kagawa A, Kuroda K, Hisashi A, Tomoyyuki F. 2007. *Stable isotopes and inorganic elements as potential indicators of geographic origin of Southeast Asian timber. International Symposium on development of improved methods to identify shorea species wood and its origin, September 25–26, 2007. Tokyo, Japan*.

Kembryte R, Danusevicius D, Buchovska J, Baliuckas V, Kavaliauskas D, Fussi B, Kempf M. 2021. DNA-based tracking of historical introductions of forest trees: the case of European beech (*Fagus sylvatica* L.) in Lithuania. *Eur. J. For*. *Res*. 140(2): 435–449. DOI: 10.1007/s10342-020-01341-0.

Kitamura K, Namikawa K, Kawahara T, Matsumoto A, Jose-Maldia LS. 2017. Genetic structure of remnant *Quercus serrata* populations at the northernmost limit of their distribution in Japan. *Acta Phytotax. Geobot*. 68(1): 1–15. DOI: 10.18942/apg.201617.

Kvesić S, Hodžić MM, Ballian D, Gömöry D, Fussi B. 2020. Genetic variation of a widespread subdominant tree species (*Acer campestre* L.) in Bosnia and Herzegovina. *Tree Genet. Genomes* 16(6): 82. DOI: 10.1007/s11295-020-01473-9.

Latutrie M, Bergeron Y, Tremblay F. 2016. Fine-scale assessment of genetic diversity of trembling aspen in northwestern North America. *BMC Evol. Biol*. 16. DOI: 10.1186/s12862-016-0810-1.

Lemes MR, Dick CW, Navarro C, Lowe AJ, Cavers S, Gribel R. 2010. Chloroplast DNA microsatellites reveal contrasting phylogeographic structure in mahogany (*Swietenia macrophylla* King, Meliaceae) from Amazonia and Central America. *Trop. Plant Biol*. 3(1): 40–49. DOI: 10.1007/s12042-010-9042-5.

Li H-y, Jiang J, Liu G-f, Ma X-j, Dong J-x, Lin S-j. 2005. Genetic variation and division of *Pinus sylvestris* provenances by ISSR markers. *J. For. Res*. 16(3): 216–218.

Li X, Zhao M, Xu Y, Li Y, Tigabu M, Zhao X. 2021. Genetic diversity and population differentiation of *Pinus koraiensis* in China. *Horticulturae* 7(5): 104.

Li Y, Zhang X, Fang Y. 2019. Landscape features and climatic forces shape the genetic structure and evolutionary history of an oak species (*Quercus chenii*) in East China. *Front. Plant Sci.* 10(1060). DOI: 10.3389/fpls.2019.01060.

Lira CF, Cardoso SRS, Ferreira PCG, Cardoso MA, Provan J. 2003. Long-term population isolation in the endangered tropical tree species *Caesalpinia echinata* Lam. revealed by chloroplast microsatellites. *Mol. Ecol.* 12(12): 3219–3225. DOI: 10.1046/j.1365-294X.2003.01991.x.

Litkowiec M, Plitta-Michalak BP, Lewandowski A, Iszkulo G. 2015. Homogenous genetic structure in populations of *Taxus baccata* with varied proportions of male and female individuals. *Silva Fenn*. 49(4): 1236.

Liu J, Jiang JM, Chen YT. 2014. Genetic diversity of central and peripheral populations of *Toona ciliata* var. *pubescens*, an endangered tree species endemic to China. *Genet. Mol. Res*. 13(2): 4579–4590. DOI: 10.4238/2014.June.17.10.

Lowe AJ, Wong KN, Tiong YS, Iyerh S, Chew FT. 2010. A DNA method to verify the integrity of timber supply chains; confirming the legal sourcing of merbau timber from logging concession to sawmill. *Silvae Genet*. 59(6): 263–268. DOI: 10.1515/sg-2010-0037.

Lupini A, Aci MM, Mauceri A, Luzzi G, Bagnato S, Menguzzato G, Mercati F, Sunseri F. 2019. Genetic diversity in old populations of sessile oak from Calabria assessed by nuclear and chloroplast SSR. *J. Mt. Sci*. 16(5): 1111–1120. DOI: 10.1007/s11629-018-5335-1.

Ma L, Peng Y, Pei Y, Zeng J, Shen H, Cao J, Qiao Y, Wu Z. 2019. Systematic discovery about NIR spectral assignment from chemical structural property to natural chemical compounds. *Sci. Rep*. 9(1): 9503. DOI: 10.1038/s41598-019-45945-y.

Mangaravite E, Vinson CC, Rody HVS, Garcia MG, Carniello MA, Silva RS, Oliveira LO. 2016. Contemporary patterns of genetic diversity of *Cedrela fissilis* offer insight into the shaping of seasonal forests in eastern South America. *Am. J. Bot*. 103(2): 307–316. DOI: 10.3732/ajb.1500370.

Maroso F, Vera M, Ferreiro J, Mayol M, Riba M, Ramil-Rego P, Martínez P, Bouza C. 2021. Genetic diversity and structure of *Taxus baccata* from the Cantabrian-Atlantic area in northern Spain: A guide for conservation and management actions. *For. Ecol. Manage*. 482: 118844. DOI: 10.1016/j.foreco.2020.118844.

McClure PJ, Chavarria GD, Espinoza E. 2015. Metabolic chemotypes of CITES protected *Dalbergia* timbers from Africa, Madagascar, and Asia. *Rapid Commun. Mass Spectrometr.* 29(9): 783–788. DOI: 10.1002/rcm.7163.

Mellick R, Lowe A, Rossetto M. 2011. Consequences of long- and short-term fragmentation on the genetic diversity and differentiation of a late successional rainforest conifer. *Aust. J. Bot*. 59(4): 351–362. DOI: 10.1071/bt10291.

Minn Y, Prinz K, Finkeldey R. 2014. Genetic variation of teak (*Tectona grandis* Linn. f.) in Myanmar revealed by microsatellites. *Tree Genet. Genomes* 10(5): 1435–1449. DOI: 10.1007/s11295-014-0772-7.

Moreira PA, Fernandes GW, Collevatti RG. 2009. Fragmentation and spatial genetic structure in *Tabebuia ochracea* (Bignoniaceae) a seasonally dry Neotropical tree. *For. Ecol. Manage*. 258(12): 2690–2695. DOI: 10.1016/j.foreco.2009.09.037.

Ndiade-Bourobou D, Daïnou K, Hardy OJ, Doumenge C, Tosso F, Bouvet J-M. 2020. Revisiting the North-South genetic discontinuity in Central African tree populations: the case of the low-density tree species *Baillonella toxisperma*. *Tree Genet. Genomes* 16(1): 15. DOI: 10.1007/s11295-019-1408-8.

Neophytou C, Aravanopoulos FA, Fink S, Dounavi A. 2010. Detecting interspecific and geographic differentiation patterns in two interfertile oak species (*Quercus petraea* (Matt.) Liebl. and *Q. robur* L.) using small sets of microsatellite markers. *For. Ecol. Manage*. 259(10): 2026–2035. DOI: 10.1016/j.foreco.2010.02.013.

Ng CH, Lee SL, Tnah LH, Ng KKS, Lee CT, Diway B, Khoo E. 2017. Geographic origin and individual assignment of *Shorea platyclados* (Dipterocarpaceae) for forensic identification. *PLoS ONE* 12(4): e0176158. DOI: 10.1371/journal.pone.0176158.

Ng KKS, Lee SL, Tnah LH, Nurul-Farhanah Z, Ng CH, Lee CT, Tani N, Diway B, Lai PS, Khoo E. 2016. Forensic timber identification: a case study of a CITES listed species, *Gonystylus bancanus* (Thymelaeaceae). *Forensic Sci. Int. Genet*. 23: 197-209. DOI: 10.1016/j.fsigen.2016.05.002.

Nguyen TM, Vu DD, Dang HP, Bui XTT, Nguyen HPL, Nguyen DM. 2021. Population genetic structure and demographic history of the dipterocarp species *Anisoptera costata* Korth revealed by microsatellite analysis. *Planta* 253(3): 66. DOI: 10.1007/s00425-021-03584-6.

Nguyen TM, Vu DD, Nguyen DM, Dang HP, Phan LK, Bui PX. 2020. Microsatellite analysis reveals genetic diversity of the endangered species *Dipterocarpus dyeri*. *J. For. Res*. 25(3): 198–201. DOI: 10.1080/13416979.2020.1747149.

Nowakowska JA. 2011. Application of DNA markers against illegal logging as a new tool for the Forest Guard Service. *Folia For. Polon. A: Forestry* 53(2): 142–149. DOI: 10.5281/zenodo.30813.

Ohsawa T, Saito Y, Ide Y. 2011a. Multiple elevational patterns of nuclear genetic variations in oak populations elucidated by grouping populations with chloroplast markers. *Scand. J. For. Res*. 26(4): 305–318. DOI: 10.1080/02827581.2011.570782.

Ohsawa T, Tsuda Y, Saito Y, Ide Y. 2011b. The genetic structure of *Quercus crispula* in northeastern Japan as revealed by nuclear simple sequence repeat loci. *J. Plant Res*. 124(6): 645–654. DOI: 10.1007/s10265-010-0402-x.

Ohsawa T, Tsuda Y, Saito Y, Sawada H, Ide Y. 2007. Altitudinal genetic diversity and differentiation of *Quercus crispula* in the Chichibu Mountains, central Japan. *Int. J. Plant Sci*. 168(3): 333–340. DOI: 10.1086/510413.

Ohtani M, Kondo T, Tani N, Ueno S, Lee LS, Ng KKS, Muhammad N, Finkeldey R, Na'iem M, Indrioko S *et al*. 2013. Nuclear and chloroplast DNA phylogeography reveals Pleistocene divergence and subsequent secondary contact of two genetic lineages of the tropical rainforest tree species *Shorea leprosula* (Dipterocarpaceae) in South-East Asia. *Mol. Ecol*. 22(8): 2264–2279. DOI: 10.1111/mec.12243.

Oreshkova NV, Belokon MM, Zham''iansuren S. 2013. Genetic diversity, population structure, and differentiation of Siberian larch, Gmelin larch and Cajander larch on SSR-markers data. *Russ. J. Genet*. 49(2): 178–186.

Ouinsavi C, Sokpon N, Khasa DP. 2009. Genetic diversity and population structure of a threatened African tree species, *Milicia excelsa*, using nuclear microsatellites DNA markers. *Int. J. For. Res*.(2009): 210179. DOI: 10.1155/2009/210179.

Oyama K, Martinez-Ramos M, Manuel Penaloza-Ramirez J, Rocha-Ramirez V, Armenta-Medina EG, Hernandez-Soto P. 2016. Population genetic structure of an extremely logged tree species *Guaiacum sanctum* L. In the Yucatan Peninsula, Mexico. *Bot. Sci.* 94(2): 34510.31155/32009/210179356. DOI: 10.17129/botsci.278.

Padutov VE, Каgаn DI, Ivanovskaya SI, Baranov OY, Razumova OA. 2021. Territorial distribution alleles of SSR-loci of chloroplast DNA of scots pine (*Pinus sylvestris* L.) in Belarus. *Dokl. Natl. Acad. Sci. Belarus* 65(1): 87–95. DOI: 10.29235/1561-8323-2021-65-1-87-95.

Paredes-Villanueva K, et al. 2020. Nuclear and plastid SNP markers for tracing *Cedrela* timber in the tropics*. Conserv. Genetics Resourc*. 12(2): 239–244. DOI: 10.1007/s12686-019-01110-1.

Paredes-Villanueva K, de Groot GA, Laros I, Bovenschen J, Bongers F, Zuidema PA. 2019. Genetic differences among *Cedrela odorata* sites in Bolivia provide limited potential for fine-scale timber tracing. *Tree Genet. Genomes* 15(3). DOI: 10.1007/s11295-019-1339-4.

Paredes-Villanueva K, Espinoza E, Ottenburghs J, Sterken MG, Bongers F, Zuidema PA. 2018. Chemical differentiation of Bolivian *Cedrela* species as a tool to trace illegal timber trade. *Forestry* 91(5): 603–613. DOI: 10.1093/forestry/cpy019.

Pastore TCM, Braga JWB, Coradin VTR, Magalhães WLE, Okino EYA, Camargos JAA, Muñiz GIBd, Bressan OA, Davrieux F. 2011. Near infrared spectroscopy (NIRS) as a potential tool for monitoring trade of similar woods: Discrimination of true mahogany, cedar, andiroba, and curupixá. *Holzforschung* 65(1): 73–80. DOI: 10.1515/hf.2011.010.

Peñaloza-Ramírez JM, Rodríguez-Correa H, González-Rodríguez A, Rocha-Ramírez V, Oyama K. 2020. High genetic diversity and stable Pleistocene distributional ranges in the widespread Mexican red oak *Quercus castanea* Née(1801) (Fagaceae). *Ecol. Evol*. 10(10): 4204–4219. DOI: 10.1002/ece3.6189.

Peng-Li Z, Jian-Ru C, Long-Qing C, Ming-Qin Z. 2019. Assessment of genetic diversity of an endangered species *Fraxinus hupehensis* based on ISSR markers. *Not. Bot. Horti Agrobot. Cluj-Napoca* 47(4): 1308–1315. DOI: 10.15835/nbha47411696.

Peng Y, Chen K. 2011. Phylogeographic Pattern of *Populus cathayana* in the Southeast of Qinghai-Tibetan Plateau of China Revealed by cpSSR Markers. *Silva Fenn*. 45(4): 583–594. DOI: 10.14214/sf.94.

Peng YH, Lu ZX, Chen K, Luukkanen O, Korpelainen H, Li CY. 2005. Population genetic survey of *Populus cathayana* originating from Southeastern Qinghai-Tibetan plateau of China based on SSR markers. *Silvae Genet*. 54(3): 116–122. DOI: 10.1515/sg-2005-0018.

Polezhaeva MA, Semerikov VL, Pimenova EA. 2013. Genetic diversity of larch at the north of Primorskii Krai and limits of *Larix olgensis* A. Henry distribution. *Russ. J. Genet*. 49(5): 497–502. DOI: 10.1134/s1022795413030149.

Poljak I, Idžojtić M, Šatović Z, Ježić M, Ćurković-Perica M, Simovski B, Acevski J, Liber Z. 2017. Genetic diversity of the sweet chestnut (*Castanea sativa* Mill.) in Central Europe and the western part of the Balkan Peninsula and evidence of marron genotype introgression into wild populations. *Tree Genet. Genomes* 13(1): 18. DOI: 10.1007/s11295-017-1107-2.

Poudel RC, Moeller M, Liu J, Gao L-M, Baral SR, Li D-Z. 2014. Low genetic diversity and high inbreeding of the endangered yews in Central Himalaya: implications for conservation of their highly fragmented populations. *Divers. Distrib*. 20(11): 1270–1284. DOI: 10.1111/ddi.12237.

Rachmat HH, Kamiya K, Harada K. 2012. Genetic diversity, population structure and conservation implication of the endemic Sumatran lowland dipterocarp tree species (*Shorea javanica*). *Int. J. Biodivers*. Conserv. 4(14): 573–583. DOI: 10.5897/IJBC12.045.

Rai C, Ginwal HS. 2018. Microsatellite analysis to study genetic diversity in Khasi pine (*Pinus kesiya* Royle ex. Gordon) using chloroplast SSR markers. *Silvae Genet*. 67(1): 99–105. DOI: 10.2478/sg-2018-0014.

Ramalho AB, Andrade J, Hein PRG. 2018. Rapid discrimination of wood species from native forest and plantations using near infrared spectroscopy. *For. Syst*. 27(2): e008. DOI: 10.5424/fs/2018272-12075.

Rasmussen KK, Strandby U, Kollmann J. 2010. High genetic diversity within but limited differentiation among populations of the vulnerable Guatemalan fir. *J. Trop. For. Sci*. 22(3): 247–259.

Rebrean F, Fustos A, Taut I, Szabo K, Harta M, Pamfil D, Rebrean M, Salagean T. 2019. Genetic diversity of *Acer pseudoplatanus* L. populations from Transylvania. *Rev. Bras. Bot*. 42(4): 643–650. DOI: 10.1007/s40415-019-00567-6.

Resende LC, Ribeiro RA, Lovato MB. 2011. Diversity and genetic connectivity among populations of a threatened tree (*Dalbergia nigra*) in a recently fragmented landscape of the Brazilian Atlantic Forest. *Genetica* 139(9): 1159–1168. DOI: 10.1007/s10709-011-9618-5.

Robledo-Arnuncio JJ, Alia R, Gil L. 2004. High levels of genetic diversity in a long-term European glacial refugium of *Pinus sylvestris* L. *For. Genet*. 11(3–4): 239–248. DOI: 10.1111/j.1365-2699.2004.01196.x.

Roman MG, Gangitano D, Figueroa A, Solano J, Anabalón L, Houston R. 2020. Use of *Eucalyptus* DNA profiling in a case of illegal logging. *Sci. Justice* 60(6): 487–494. DOI: 10.1016/j.scijus.2020.09.005.

Salvini D, Anzidei M, Fineschi S, Malvolti ME, Taurchini D, Vendramin GG. 2001. Low genetic differentiation among Italian populations of *Populus tremula* L. (Salicaceae) estimated using chloroplast PCR-RFLP and microsatellite markers. *For. Genet*. 8(1): 81–87.

Sandak A, Modzelewska I, Sandak J. 2011. Fourier transform near infrared analysis of waste paper with the addition of cereal bran biodegraded by ascomycetes fungi. *J. Near Infrared Spectrosc*. 19(5): 369–379. DOI: 10.1255/jnirs.951.

Scotti-Saintagne C, et al. 2013. Amazon diversification and cross-Andean dispersal of the widespread Neotropical tree species *Jacaranda copaia* (Bignoniaceae). *J. Biogeogr*. 40(4): 707–719. DOI: 10.1111/j.1365-2699.2012.02797.x.

Sekiewicz K, Walas L, Beridze B, Fennane M, Dering M. 2020. High genetic diversity and low future habitat suitability: will *Cupressus atlantica*, endemic to the High Atlas, survive under climate change? *Reg. Environ. Change* 20(4). DOI: 10.1007/s10113-020-01711-9.

Semerikov VL, et al. 2014. Microsatellite Loci polymorphism of chloroplast DNA of the pine tree (*Pinus sylvestris* L.) in Asia and Eastern Europe. *Genetika* 50(6): 660–669.

Senakun C, Changtragoon S, Pramual P, Prathepha P. 2011. Genetic structure and diversity of *Shorea obtusa* (Dipterocarpaceae) in Thailand. *J. Syst. Evol*. 49(2): 120–125. DOI: 10.1111/j.1759-6831.2010.00109.x.

Silva DC, Pastore TCM, Soares LF, de Barros FAS, Bergo MCJ, Coradin VTH, Gontijo AB, Sosa MH, Chacon CB, Braga JWB. 2018. Determination of the country of origin of true mahogany (*Swietenia macrophylla* King) wood in five Latin American countries using handheld NIR devices and multivariate data analysis. *Holzforschung* 72(7): 521–530. DOI: 10.1515/hf-2017-0160.

Silva Júnior ALd, Cabral RLR, Sartori L, Souza LCd, Miranda FDd, Caldeira MVW, Moreira SO, Godinho TdO. 2020. Evaluation of diversity and genetic structure as strategies for conservation of natural populations of *Dalbergia nigra* (vell.) Allemão ex benth. *Cerne* 26(4): 435–443. DOI: 10.1590/01047760202026042754.

Snel FA, Braga JWB, da Silva D, Wiedenhoeft AC, Costa A, Soares R, Coradin VTR, Pastore TCM. 2018. Potential field-deployable NIRS identification of seven *Dalbergia* species listed by CITES. *Wood Sci. Technol.* 52(5) 1411–1427. DOI: 10.1007/s00226-018-1027-9.

Soares LF, da Silva JR, Bergo MCJ, Coradin VTH, Braga JWB, Pastore TCM. 2017. Evaluation of a NIR handheld device and PLS-DA for discrimination of six similar Amazonian wood species. *Quim. Nova* 40(4): 418–426. DOI: 10.21577/0100-4042.20170014.

Suzuki Spence ES, Fant JB, Gailing O, Griffith MP, Havens K, Hipp AL, Kadav P, Kramer A, Thompson P, Toppila R et al. 2021. Comparing genetic diversity in three threatened oaks. *Forests* 12(5): 561. DOI: 10.3390/f12050561.

Svetlakova TN, Boronnikova SV, Yanbaev YA. 2014. Short note: Genetic diversity and differentiation in Ural populations of the aspen, *Populus tremula* L., as revealed by inter-simply sequence repeat (ISSR) markers. *Silvae Genet*. 63(1-2): 39–41. DOI: 10.1515/sg-2014-0006.

Tam NM, Duy VD, Duc NM, Giap VD. 2014a. Genetic diversity in the natural populations of *Dipterocarpus costatus* (Dipterocarpaceae). *Res. J. Biotechnol*. 9(8): 14–26.

Tam NM, Duy VD, Duc NM, Giap VD, Xuan BTT. 2014b. Genetic variation in and spatial structure of natural populations of *Dipterocarpus alatus* (Dipterocarpaceae) determined using single sequence repeat markers. *Genet. Mol. Res*. 13(3): 5378–5386. DOI: 10.4238/2014.July.24.17.

Tanaka S, Ito M. 2020a. DNA barcoding for identification of agarwood source species using trnL-trnF and matK DNA sequences. *J. Nat. Med*. 74(1): 42–50. DOI: 10.1007/s11418-019-01338-z.

Tanaka S, Ito M. 2020b. Species identification of Indonesian agarwood using a DNA-barcoding method. *J. Nat. Med*. 74(1): 323–330. DOI: 10.1007/s11418-019-01362-z.

Tinio CE, Finkeldey R, Prinz K, Fernando ES. 2014. Genetic variation in natural and planted populations of *Shorea guiso* (Dipterocarpaceae) in the Philippines revealed by microsatellite DNA markers. *Asia Life Sci.* 23(1): 75–91.

Tsuchikawa S, Inoue K, Noma J, Hayashi K. 2003. Application of near-infrared spectroscopy to wood discrimination. *J. Wood Sci*. 49(1): 0029–0035. DOI: 10.1007/s100860300005.

Vasilyeva YS, Sboeva YV, Boronnikova SV, Chertov NV, Beltyukova NN. 2020a. Genetic diversity, genetic structure and differentiation of Siberian larch populations in the Urals. *Turczaninowia* 23(3): 67–82. DOI: 10.14258/turczaninowia.23.3.7.

Vasilyeva YS, Zhulanov AA, Boronnikova SV, Yanbaev YA. 2020b. Genetic structure of ural populations of *Larix sibirica* Ledeb. on the base of analysis of nucleotide polymorphism. *Silvae Genet*. 69(1): 20–28. DOI: 10.2478/sg-2020-0004.

Vendramin GG, Anzidei M, Madaghiele A, Sperisen C, Bucci G. 2000. Chloroplast microsatellite analysis reveals the presence of population subdivision in Norway spruce (*Picea abies* K.). *Genome* 43(1): 68–78.

Vlam M, de Groot GA, Boom A, Copini P, Laros I, Veldhuijzen K, Zakamdi D, Zuidema PA. 2018. Developing forensic tools for an African timber: Regional origin is revealed by genetic characteristics, but not by isotopic signature. *Biol. Conserv*. 220: 262–271. DOI: 10.1016/j.biocon.2018.01.031.

Wachowiak W, Lewandowski A, Prus-Glowacki W. 2005. Reciprocal controlled crosses between *Pinus sylvestris* and P-mugo verified by a species-specific cpDNA marker. *J. Appl. Genet*. 46(1): 41–43.

Wang Z-F, Cao H-L, Cai C-X, Wang Z-M. 2020. Using genetic markers to identify the origin of illegally traded agarwood-producing *Aquilaria sinensis* trees. *Glob. Ecol. Conserv*. 22: e00958. DOI: 10.1016/j.gecco.2020.e00958.

Watkinson CJ, Gasson P, Rees GO, Boner M. 2020. The development and use of isoscapes to determine the geographical origin of *Quercus* spp. In the United States. Forests 11(8): 862. DOI: 10.3390/f11080862.

Wei Z, Du Q, Zhang J, Li B, Zhang D. 2013. Genetic diversity and population structure in Chinese indigenous poplar (*Populus simonii*) populations using microsatellite markers. Plant Mol. Biol. Rep 31(3): 620–632. DOI: 10.1007/s11105-012-0527-2.

Wojkiewicz B, Litkowiec M, Wachowiak W. 2016. Contrasting patterns of genetic variation in core and peripheral populations of highly outcrossing and wind pollinated forest tree species. *Aob Plants* 8: plw054. DOI: 10.1093/aobpla/plw054.

Wu X, Wang L, Zhang D, Wen Y. 2019. Microsatellite null alleles affected population genetic analyses: a case study of Maire yew (*Taxus chinensis* var. *mairei*). *J. For. Res*. 24(4): 230–234. DOI: 10.1080/13416979.2019.1634230.

Zhan X, Li P, Hui W, Deng Y, Gan S, Sun Y, Zhao X, Chen X, Deng X. 2019. Genetic diversity and population structure of *Toona ciliata* revealed by simple sequence repeat markers. *Biotechnol. Biotechnol. Equip*. 33(1): 214–222. DOI: 10.1080/13102818.2018.1561210.

Zhang D-Q, Zhou N. 2013. Genetic diversity and population structure of the endangered conifer *Taxus wallichiana* var. *mairei* (Taxaceae) revealed by Simple Sequence Repeat (SSR) markers. *Biochem. Syst. Ecol.* 49: 107–114. DOI: 10.1016/j.bse.2013.03.030.

Zorrilla-Azcue S, Gonzalez-Rodriguez A, Oyama K, Gonzalez MA, Rodriguez-Correa H. 2021. The DNA history of a lonely oak: *Quercus humboldtii* phylogeography in the Colombian Andes. *Ecol. Evo*l. 11(11): 6814–6828. DOI: 10.1002/ece3.7529.

Zukowska WB, Wachowiak W. 2017. Nuclear microsatellite markers reveal the low genetic structure of *Pinus mugo* Turra (dwarf mountain pine) populations in Europe. *Plant Syst. Evol*. 303(5): 641–651. DOI: 10.1007/s00606-017-1395-x.
